# Supplementary material
Source: PubMed Central journal article supplement (PMC1831729)
Supplement: pmed.0040079.st001.pdf [file pmed.0040079.st001.pdf]

| ID   | AUTHOR         | YEAR | JOURNAL                          | COUNTRY     | ANY SIGNIFICANT | ANY NON SIGNIFICANT | CONTRAST RISK | RELATIVE SIGNIFICANCE | RISK FACTOR                                                                                                                                                                      | OUTCOME                                     |
|------|----------------|------|----------------------------------|-------------|-----------------|---------------------|---------------|-----------------------|----------------------------------------------------------------------------------------------------------------------------------------------------------------------------------|---------------------------------------------|
| 4003 | Fried LF       | 2005 | J Am Soc Nephrol                 | USA         | 1               | 0                   | qua 4 vs 1    | 1.69                  | 1 cystatin C                                                                                                                                                                     | noncardiovascular mortality                 |
| 4004 | Messer LC      | 2005 | Matern Child Health J            | USA         | 1               | 1                   | qua 4 vs 1    | 3.4                   | 1 pregnancy intendness                                                                                                                                                           | levels of perceived stress during pregnancy |
| 4006 | Butler LM      | 2005 | Am J Respir Crit Care Med        | USA         | 1               | 0                   | qua 4 vs 1    | 1.43                  | 1 meat-dim sum pattern                                                                                                                                                           | new-onset cough with phlegm                 |
| 4008 | Cocco P        | 2005 | Cancer Res                       | Italy       | 0               | 1                   | qua 4 vs 1    | 2.00                  | 0 dichlorodiphenyltrichloroethane                                                                                                                                                | stomach cancer mortality                    |
| 4010 | Li G           | 2005 | Neurology                        | USA         | 0               | 1                   | qua 4 vs 1    | 1.16                  | 0 total cholesterol                                                                                                                                                              | dementia                                    |
| 4013 | Larsson SC     | 2005 | Am J Clin Nutr                   | Sweden      | 1               | 0                   | qua 4 vs 1    | 0.59                  | 1 high-fat dairy foods/d                                                                                                                                                         | colorectal cancer                           |
| 4016 | Beddhu S       | 2005 | J Ren Nutr                       | USA         | 1               | 0                   | qua 4 vs 1    | 1.89                  | 1 total protein intake                                                                                                                                                           | low serum albumin                           |
| 4019 | Thorand B      | 2005 | Diabetes                         | Germany     | 1               | 0                   | qua 4 vs 1    | 1.73                  | 1 IL-18                                                                                                                                                                          | type 2 diabetes                             |
| 4020 | Luchtenborg M  | 2005 | Cancer Causes Control            | Netherlands | 1               | 1                   | qua 4 vs 1    | 1.61                  | 0 Meat product consumption                                                                                                                                                       | colon tumours with truncating APC mutation  |
| 4021 | Park HA        | 2005 | Atherosclerosis                  | USA         | 1               | 1                   | qua 4 vs 1    | 1.99                  | 1 saturated fat intake                                                                                                                                                           | coronary calcification                      |
| 4022 | Koushik A      | 2005 | Cancer Epidemiol Biomarkers Prev | USA         | 0               | 1                   | qua 4 vs 1    | 1.06                  | 0 fruit intake                                                                                                                                                                   | ovarian cancer                              |
| 4023 | Rock CL        | 2005 | J Clin Oncol                     | USA         | 1               | 0                   | qua 4 vs 1    | 0.57                  | 1 plasma total carotenoid concentration                                                                                                                                          | new breast cancer event                     |
| 4025 | Sornay-Rendu E | 2005 | J Bone Miner Res                 | France      | 1               | 0                   | qua 4 vs 1    | 2.20                  | 1 bone alkaline phosphatase                                                                                                                                                      | fracture                                    |
| 4030 | Wakai K        | 2005 | Cancer Sci                       | Japan       | 1               | 1                   | qua 4 vs 1    | 0.80                  | 0 total fat intake                                                                                                                                                               | breast cancer                               |
| 4031 | Ito Y          | 2005 | J Epidemiol                      | Japan       | 1               | 0                   | qua 4 vs 1    | 0.41                  | 1 serum alpha-carotenes                                                                                                                                                          | lung cancer death                           |
| 4034 | Merkin SS      | 2005 | Am J Kidney Dis                  | USA         | 1               | 0                   | qua 4 vs 1    | 1.60                  | 1 Individual-level socioeconomic status area                                                                                                                                     | progressive Chronic kidney disease          |
| 4036 | Schulze MB     | 2005 | Diabet Med                       | USA         | 1               | 0                   | qua 4 vs 1    | 5.73                  | 1 proinsulin                                                                                                                                                                     | diabetes                                    |
| 4037 | Bower M        | 2005 | Ann Intern Med                   | UK          | 1               | 0                   | qua 4 vs 1    | 0.15                  | 1 International Prognostic Index (factors: age, tumor stage, lactate dehydrogenase level, Eastern Cooperative Oncology Group performance status, and number of extranodal sites) | death                                       |
| 4038 | Whittemore AS  | 2005 | J Urol                           | USA         | 1               | 0                   | qua 4 vs 1    | 4.40                  | 1 serum Prostate specific antigen                                                                                                                                                | prostate cancer                             |
| 4040 | Rajpathak S    | 2005 | J Am Coll Nutr                   | USA         | 1               | 1                   | qua 4 vs 1    | 0.43                  | 1 toenail selenium                                                                                                                                                               | prevalent diabetes                          |

|      |                 |                                 |             |   |                  |      |                                         |                                                 |
|------|-----------------|---------------------------------|-------------|---|------------------|------|-----------------------------------------|-------------------------------------------------|
| 4041 | Bergelt C       | 2005 Cancer                     | Denmark     | 1 | 0 qua 4 vs 1     | 0.80 | 1 vital exhaustion scores               | cancer at all sites                             |
| 4043 | Schoen RE       | 2005 Gastroenterology           | USA         | 1 | 1 qua 4 vs 1     | 1.70 | 1 IGF-I                                 | adenoma                                         |
| 4047 | Lukanova A      | 2005 Int J Cancer               | USA         | 1 | 1 qua 4 vs 1     | 1.29 | 1 BMI                                   | any malignancy                                  |
| 4048 | Mannisto S      | 2005 Cancer Causes Control      | Finland     | 1 | 0 qua 4 vs 1     | 0.69 | 1 Pork, processed Meat, potatoes        | breast cancer                                   |
| 4050 | Selvin E        | 2005 Diabetes Care              | USA         | 1 | 0 qua 4 vs 1     | 2.46 | 1 HbA1C                                 | carotid intima-media thickness                  |
| 4055 | Schernhammer ES | 2005 J Natl Cancer Inst         | USA         | 1 | 1 qua 4 vs 1     | 0.59 | 1 6-sulphatoxymelatonin                 | breast cancer                                   |
| 4056 | Bergink AP      | 2005 Bone                       | Netherlands | 1 | 0 qua 4 vs 1     | 2.80 | 1 femoral neck bone mineral density     | radiographic osteoarthritis of the knee         |
| 4057 | Leosdottir M    | 2005 J Intern Med               | Sweden      | 1 | 0 qua 4 vs 1     | 1.46 | 1 total fat intake                      | cancer mortality                                |
| 4058 | Tsimikas S      | 2005 N Engl J Med               | USA         | 1 | 0 qua 4 vs 1     | 3.12 | 1 oxidized phospholipid:apo B-100 ratio | coronary artery disease                         |
| 4059 | Benner JS       | 2005 Am J Health Syst Pharm     | USA         | 1 | 0 qua 4 vs 1     | 1.15 | 1 LDL cholesterol reduction             | adherence to lipid-lowering drug therapy.       |
| 4060 | Wang J          | 2005 Psychol Med                | Canada      | 1 | 0 qua 4 vs 1+2+3 | 2.35 | 1 work stress                           | major depressive episodes                       |
| 4062 | Elkind MS.      | 2005 Neurology                  | USA         | 1 | 0 qua 4 vs 1     | 1.75 | 1 leukocyte count                       | ischemic stroke                                 |
| 4063 | Ness AR         | 2005 Heart                      | UK          | 1 | 0 qua 4 vs 1     | 0.40 | 1 childhood intake of vegetables        | stroke                                          |
| 4064 | Seddon JM       | 2005 Arch Ophthalmol            | USA         | 1 | 1 qua 4 vs 1     | 2.10 | 1 CRP                                   | progression of age-related macular degeneration |
| 4065 | Silvera SA      | 2005 Cancer Causes Control      | USA         | 0 | 1 qua 4 vs 1     | 1.43 | 0 glycemic index                        | pancreatic cancer                               |
| 4066 | Lundblad D      | 2005 J Intern Med               | Sweden      | 1 | 0 qua 4 vs 1     | 19.1 | 1 tPA activity                          | myocardial infarction                           |
| 4067 | Lim S           | 2005 Diabetes Res Clin Pract    | Korea       | 1 | 0 qua 4 vs 1     | 2.36 | 1 CRP                                   | waist circumference                             |
| 4068 | Phipatanakul W  | 2005 Ann Allergy Asthma Immunol | USA         | 1 | 0 qua 4 vs 1     | 2.32 | 1 levels of endotoxin                   | wheeze in the first year of life                |
| 4071 | Van Guelpen B   | 2005 Stroke                     | Sweden      | 1 | 1 qua 4 vs 1     | 0.21 | 1 Plasma folate                         | hemorrhagic stroke                              |
| 4073 | Berndt SI.      | 2005 Nutrition                  | USA         | 0 | 1 qua 4 vs 1     | 1.31 | 0 plasma concentration of vitamin C     | prostate cancer                                 |
| 4075 | Yeh HC          | 2005 Diabetes Care              | USA         | 1 | 0 qua 4 vs 1     | 1.60 | 1 Forced vital capacity                 | type 2 diabetes                                 |
| 4076 | Sato Y          | 2005 Public Health Nutr         | Japan       | 0 | 1 qua 4 vs 1     | 1.13 | 0 fruit and vegetable intake            | colon cancer                                    |
| 4077 | Loucks EB       | 2005 Psychosom Med              | USA         | 1 | 1 qua 4 vs 1     | 2.29 | 1 Social integration                    | plasma concentrations of fibrinogen             |
| 4079 | Wattanakit K    | 2005 Atherosclerosis            | USA         | 1 | 0 qua 4 vs 1     | 1.75 | 1 triglycerides                         | peripheral arterial disease                     |
| 4081 | Kaaks R         | 2005 J Natl Cancer Inst         | France      | 1 | 1 qua 4 vs 1     | 1.73 | 1 serum concentrations of testosterone  | breast cancer                                   |

|      |                    |                                       |             |   |                  |      |                                                               |                                                       |
|------|--------------------|---------------------------------------|-------------|---|------------------|------|---------------------------------------------------------------|-------------------------------------------------------|
| 4082 | Sesso HD           | 2005 Cancer Epidemiol Biomarkers Prev | USA         | 0 | 1 qua 4 vs 1     | 0.93 | 0 plasma lycopene                                             | breast cancer                                         |
| 4083 | Nair GV            | 2005 Chest                            | USA         | 1 | 0 qua 4 vs 1     | 1.47 | 1 Pulse pressure                                              | Myocardial infarction or Coronary heart disease death |
| 4085 | Wong TY            | 2005 Arch Intern Med                  | Australia   | 1 | 0 qua 4 vs 1     | 1.53 | 1 arteriole-to-venule ratio                                   | type 2 diabetes                                       |
| 4088 | Garcia-Palmieri MR | 2005 Nutr Metab Cardiovasc Dis        | USA         | 1 | 0 qua 4 vs 1     | 1.38 | 1 pulse pressure                                              | cardiovascular mortality                              |
| 4089 | Wrensch M          | 2005 Am J Epidemiol                   | USA         | 1 | 0 qua 4 vs 1     | 0.41 | 1 immunoglobulin G to varicella-zoster virus                  | adult glioma                                          |
| 4091 | Visser M           | 2005 J Gerontol A Biol Sci Med Sci    | Netherlands | 1 | 0 qua 4 vs 1     | 1.90 | 1 muscle area                                                 | Mobility limitations                                  |
| 4092 | Tsubono Y          | 2005 Br J Cancer                      | Japan       | 0 | 1 qua 4 vs 1     | 0.92 | 0 fruit intake                                                | colorectal cancer                                     |
| 4094 | Mielke MM          | 2005 Neurology                        | USA         | 1 | 0 qua 4 vs 1     | 0.31 | 1 cholesterol levels                                          | dementia                                              |
| 4095 | Tworoger SS        | 2005 J Natl Cancer Inst               | USA         | 1 | 1 qua 4 vs 1     | 1.70 | 0 free estradiol                                              | breast cancer                                         |
| 4098 | Svensson AM        | 2005 Eur Heart J                      | Sweden      | 1 | 0 qua 4 vs 1     | 2.66 | 1 blood glucose                                               | all-cause mortality                                   |
| 4099 | Lu M               | 2005 Am J Clin Nutr                   | USA         | 1 | 0 qua 4 vs 1     | 2.20 | 1 linolenic acid intake                                       | Nuclear opacity                                       |
| 4101 | Tsushima M         | 2005 Dig Dis Sci                      | USA         | 0 | 1 qua 4 vs 1     | 1.33 | 0 serum glucose                                               | rectal cancer                                         |
| 4102 | Tanne D            | 2005 Stroke                           | Israel      | 1 | 0 qua 4 vs 1     | 1.53 | 1 skinfold thickness                                          | stroke mortality                                      |
| 4103 | Stattin P          | 2004 Cancer Causes Control            | Sweden      | 1 | 1 qua 4 vs 1     | 1.22 | 0 plasma enterolactone                                        | prostate cancer                                       |
| 4104 | De Cosmo S         | 2005 Diabetes Care                    | Italy       | 1 | 0 qua 4 vs 1     | 4.10 | 1 homeostasis model assessment of insulin resistance          | albumin-to-creatinine ratio                           |
| 4108 | Mehling WE         | 2005 J Psychosom Res                  | USA         | 1 | 0 qua 4 vs 1     | 2.00 | 1 alexithymia summary scores                                  | low back pain                                         |
| 4109 | Margolis KL        | 2005 Arch Intern Med                  | USA         | 1 | 0 qua 4 vs 1     | 2.36 | 1 WBC counts                                                  | CHD death                                             |
| 4110 | Meier C            | 2005 J Bone Miner Res                 | Australia   | 1 | 0 qua 4 vs 1     | 2.8  | 1 carboxyterminal cross-linked telopeptide of type I collagen | fracture                                              |
| 4113 | Al Snih S          | 2004 Aging Clin Exp Res               | USA         | 1 | 0 qua 4 vs 1     | 1.90 | 1 hand grip strength                                          | new ADL limitation                                    |
| 4114 | Wang TJ            | 2005 Circulation                      | USA         | 1 | 0 qua 4 vs 1     | 1.93 | 1 urine albumin-creatinine ratio                              | hypertension                                          |
| 4115 | Rumbold AR         | 2005 Eur J Obstet Gynecol Reprod Biol | Australia   | 1 | 0 qua 4 vs 1+2+3 | 1.75 | 1 vitamin E intake                                            | hypertensive disorders                                |
| 4116 | Hoffmeister A      | 2005 Eur J Intern Med                 | Germany     | 0 | 1 qua 4 vs 1     | 1.30 | 0 CRP                                                         | cardiovascular event                                  |
| 4118 | Hedblad B          | 2005 Atherosclerosis                  | Sweden      | 1 | 0 qua 4 vs 1     | 2.20 | 1 CO exposure                                                 | CVD events                                            |
| 4120 | Kojima M           | 2005 Am J Epidemiol                   | Japan       | 1 | 0 qua 4 vs 1     | 0.24 | 1 omega-3 polyunsaturated fatty acids                         | colorectal cancer                                     |
| 4121 | Kragelund C        | 2005 N Engl J Med                     | Denmark     | 1 | 0 qua 4 vs 1     | 2.40 | 1 NT-pro-BNP levels                                           | death from any cause                                  |
| 4123 | Kurl S             | 2005 Stroke                           | Finland     | 1 | 0 qua 4 vs 1     | 2.70 | 1 exercise cardiac power                                      | any stroke                                            |
| 4124 | Kim MK             | 2005 Int J Cancer                     | Japan       | 1 | 1 qua 4 vs 1     | 2.06 | 1 traditional pattern                                         | colon cancer                                          |

|      |                    |                                       |             |   |                  |      |                                                                            |                                               |
|------|--------------------|---------------------------------------|-------------|---|------------------|------|----------------------------------------------------------------------------|-----------------------------------------------|
| 4126 | Oei HH             | 2005 Circulation                      | Netherlands | 1 | 1 qua 4 vs 1     | 1.97 | 1 Lp-PLA2 activity                                                         | coronary heart disease                        |
| 4129 | Kado DM            | 2005 Am J Med                         | USA         | 1 | 0 qua 4 vs 1     | 1.60 | 1 plasma folate                                                            | cognitive decline                             |
| 4132 | Gilbert PB         | 2005 J Infect Dis                     | USA         | 1 | 1 qua 4 vs 1     | 0.22 | 1 antibody blocking of gp120 binding to s-D4                               | infection                                     |
| 4136 | Ray JG             | 2005 Obstet Gynecol                   | Canada      | 1 | 0 qua 4 vs 1     | 2.60 | 1 maternal weight                                                          | neural tube defects                           |
| 4139 | Bruno G            | 2005 Diabetes Care                    | Italy       | 1 | 1 qua 4 vs 1     | 1.20 | 1 fasting C-peptide                                                        | age                                           |
| 4140 | Engstrom G         | 2005 Diabetes                         | Sweden      | 1 | 0 qua 4 vs 1     | 5.60 | 1 plasma proteins                                                          | Diabetes development                          |
| 4141 | Montonen J         | 2005 Eur J Clin Nutr                  | Finland     | 1 | 0 qua 4 vs 1     | 0.69 | 1 green vegetables                                                         | type II diabetes mellitus                     |
| 4142 | Schupf N           | 2005 J Am Geriatr Soc                 | USA         | 1 | 0 qua 4 vs 1     | 1.80 | 1 total cholesterol, non-HDL-C, and LDL-C                                  | all cause mortality                           |
| 4145 | Montonen J         | 2005 Am J Epidemiol                   | Finland     | 1 | 0 qua 4 vs 1     | 0.72 | 1 prudent pattern                                                          | type 2 diabetes                               |
| 4146 | Taylor HA          | 2005 Am J Cardiol                     | USA         | 1 | 0 qua 4 vs 1     | 5.00 | 1 serum inflammatory markers (fibrinogen and von Willebrand Factor levels) | occurrence of coronary heart diseaseevents    |
| 4148 | Mahabir S          | 2005 Cancer Epidemiol Biomarkers Prev | USA         | 1 | 1 qua 4 vs 1     | 0.53 | 1 alcohol intake                                                           | renal cell cancer                             |
| 4149 | Raaschou-Nielsen O | 2005 Cancer Epidemiol Biomarkers Prev | Denmark     | 1 | 1 qua 4 vs 1     | 0.70 | 0 1.1-dichloro-2. 2-bis(p-chlorophenyl)ethylene concentration              | breast cancer                                 |
| 4150 | Rinaldi S          | 2005 Cancer Epidemiol Biomarkers Prev | France      | 1 | 1 qua 4 vs 1     | 1.93 | 1 insulin-like growth factor-I (IGF-I)                                     | breast cancer                                 |
| 4151 | Nakanishi N        | 2005 Arch Intern Med                  | Japan       | 1 | 0 qua 4 vs 1     | 0.54 | 1 daily life energy expenditure                                            | hypertension                                  |
| 4153 | Schulze MB         | 2004 Diabetologia                     | USA         | 1 | 0 qua 4 vs 1     | 1.97 | 1 non-HDL cholesterol                                                      | CHD                                           |
| 4154 | Mai V              | 2005 Int J Epidemiol                  | USA         | 1 | 1 qua 4 vs 1     | 0.62 | 1 Recommended Foods Score (RFS)                                            | incident lung cancer                          |
| 4156 | Thomson CC         | 2004 J Public Health Manag Pract      | USA         | 1 | 1 qua 4 vs 1     | 0.79 | 1 tax                                                                      | experimentation                               |
| 4157 | Tan ZS             | 2005 Arch Neurol                      | USA         | 1 | 0 qua 4 vs 1+2+3 | 2.04 | 1 femoral neck BMD                                                         | AD                                            |
| 4160 | Shy BD             | 2004 Prehosp Emerg Care               | USA         | 1 | 0 qua 4 vs 1+2+3 | 0.42 | 1 time from patient collapse until intubation                              | survival                                      |
| 4161 | van Gelder BM      | 2004 Neurology                        | Netherlands | 1 | 0 qua 4 vs 1+2+3 | 2.60 | 1 activity duration                                                        | 10-year cognitive decline                     |
| 4162 | Engstrom G         | 2004 J Vasc Surg                      | Sweden      | 1 | 1 qua 4 vs 1     | 2.90 | 1 inflammation-sensitive plasma proteins (ISPs)                            | peripheral artery disease requiring treatment |
| 4164 | Schnabel R         | 2005 Eur Heart J                      | Germany     | 1 | 0 qua 4 vs 1     | 3.70 | 1 Nt-proBNP                                                                | cardiovascular risk                           |
| 4166 | Pussinen PJ        | 2005 Eur J Cardiovasc Prev Rehabil    | Finland     | 1 | 1 qua 4 vs 1     | 3.99 | 1 antibody levels                                                          |                                               |

|      |                |                                       |             |   |                  |      |                                            |                                                               |
|------|----------------|---------------------------------------|-------------|---|------------------|------|--------------------------------------------|---------------------------------------------------------------|
| 4167 | De Michele M   | 2004 Eur J Cardiovasc Prev Rehabil    | Italy       | 1 | 0 qua 4 vs 1+2+3 | 0.42 | 1 HDL-C                                    | carotid intima-media thickening                               |
| 4179 | Baumgartner KB | 2004 Am J Epidemiol                   | USA         | 1 | 0 qua 4 vs 1     | 0.16 | 1 body mass index                          | tumor size                                                    |
| 4181 | Krause N       | 2004 Am J Ind Med                     | USA         | 1 | 0 qua 4 vs 1     | 1.65 | 1 operators reporting ergonomic problems   | low back injury                                               |
| 4184 | Chen C         | 2005 Cancer                           | USA         | 1 | 1 qua 4 vs 1     | 0.67 | 0 IGF-I levels                             | risk of prostate carcinoma                                    |
| 4185 | Esmailzadeh A  | 2005 Eur J Clin Nutr                  | Iran        | 1 | 0 qua 4 vs 1     | 0.61 | 1 whole-grain intake                       | hypertriglyceridemia                                          |
| 4186 | Suzuki K       | 2004 Cancer Epidemiol Biomarkers Prev | Japan       | 1 | 1 qua 4 vs 1     | 3.40 | 1 serum oxLDL                              | colorectal cancer                                             |
| 4187 | Yuan JM        | 2004 Cancer Epidemiol Biomarkers Prev | USA         | 1 | 1 qua 4 vs 1     | 0.38 | 0 alpha-carotene                           | gastric cancer                                                |
| 4189 | Kitamura A     | 2004 Stroke                           | Japan       | 1 | 0 qua 4 vs 1     | 3.00 | 1 maximum IMT of the common carotid artery | stroke                                                        |
| 4190 | Giltay EJ      | 2004 Arch Gen Psychiatry              | Netherlands | 1 | 0 qua 4 vs 1     | 0.55 | 1 optimism                                 | all-cause mortality                                           |
| 4191 | Sweeney C      | 2004 Am J Epidemiol                   | USA         | 1 | 1 qua 4 vs 1     | 1.44 | 1 BMI                                      | breast cancer                                                 |
| 4192 | Michaud DS     | 2004 Am J Epidemiol                   | USA         | 0 | 1 qua 4 vs 1     | 1.13 | 0 inorganic arsenic concentration          | bladder cancer                                                |
| 4193 | Rossi R        | 2004 J Am Coll Cardiol                | Italy       | 1 | 0 qua 4 vs 1     | 5.77 | 1 flow-mediated dilation                   | hypertension                                                  |
| 4194 | Hill DJ        | 2004 Pediatr Allergy Immunol          | Australia   | 1 | 0 qua 4 vs 1+2+3 | 5.90 | 1 atopic dermatitis                        | IgE-mediated food allergy                                     |
| 4196 | Luchsinger JA  | 2004 Neurology                        | USA         | 1 | 0 qua 4 vs 1     | 1.70 | 1 insulin                                  | Alzheimer disease                                             |
| 4198 | Dallaire F     | 2004 Environ Health Perspect          | Canada      | 1 | 1 qua 4 vs 1     | 1.32 | 0 exposure to PCBs                         | upper respiratory tract infections                            |
| 4200 | Vriesendorp TM | 2004 Eur J Vasc Endovasc Surg         | Netherlands | 1 | 0 qua 4 vs 1     | 5.10 | 1 post-operative glucose levels            | post-operative infections                                     |
| 4201 | Kobayashi M    | 2004 Nutr Cancer                      | Japan       | 0 | 1 qua 4 vs 1     | 1.07 | 0 fish consumption                         | colon cancer                                                  |
| 4204 | Nguyen L       | 2004 J Acquir Immune Defic Syndr      | USA         | 1 | 0 qua 4 vs 1+2+3 | 3.92 | 1 HLA score                                | higher viral load                                             |
| 4207 | Boekholdt SM   | 2004 Am J Med                         | Netherlands | 1 | 0 qua 4 vs 1     | 1.60 | 1 macrophage migration inhibitory factor   | myocardial infarction or death due to coronary artery disease |
| 4208 | Tworoger SS    | 2004 Cancer Res                       | USA         | 1 | 1 qua 4 vs 1     | 1.34 | 1 Prolactin                                | breast cancer                                                 |
| 4209 | Ribeiro JC     | 2004 Am J Hum Biol                    | Portugal    | 1 | 0 qua 4 vs 1     | 2.00 | 1 blood pressure. cholesterol. and obesity | 2 or 3 risk factors of metabolic syndrome                     |
| 4210 | Rusiecki JA    | 2004 J Natl Cancer Inst               | USA         | 0 | 1 qua 4 vs 1     | 0.88 | 0 atrazine lifetime days                   | prostate cancer                                               |
| 4212 | Elkins JS      | 2004 Neurology                        | USA         | 1 | 0 qua 4 vs 1     | 0.68 | 1 Stroke risk                              | decline on the 3MS                                            |
| 4213 | Bautista LE    | 2005 J Hum Hypertens                  | USA         | 1 | 0 qua 4 vs 1     | 2.30 | 1 interleukin 6 levels                     | High blood pressure                                           |
| 4215 | Weinstein AR   | 2004 JAMA                             | USA         | 1 | 1 qua 4 vs 1     | 0.82 | 1 overall activity                         | diabetes                                                      |
| 4216 | Manjer J       | 2004 Int J Cancer                     | Sweden      | 1 | 0 qua 4 vs 1     | 2.02 | 1 estrone                                  | breast cancer                                                 |

|      |                  |                                       |             |   |                  |      |                                                     |                                                                |
|------|------------------|---------------------------------------|-------------|---|------------------|------|-----------------------------------------------------|----------------------------------------------------------------|
| 4217 | English DR       | 2004 Cancer Epidemiol Biomarkers Prev | Australia   | 1 | 1 qua 4 vs 1     | 2.30 | 0 consumption of fresh red meat                     | rectal cancer                                                  |
| 4219 | Reijman M        | 2004 Arthritis Rheum                  | Netherlands | 1 | 0 qua 4 vs 1     | 4.20 | 1 C-telopeptide fragments of type II collagen level | radiographic OA of the knee                                    |
| 4220 | Dijk JM          | 2004 Stroke                           | Netherlands | 1 | 0 qua 4 vs 1     | 2.10 | 1 Arterial stiffness                                | ischemic stroke or TIA                                         |
| 4221 | Duncan BB        | 2004 Diabetes                         | Brazil      | 1 | 1 qua 4 vs 1     | 0.18 | 1 adiponectin levels                                | diabetes                                                       |
| 4223 | Saw SM           | 2004 Invest Ophthalmol Vis Sci        | Singapore   | 1 | 0 qua 4 vs 1     | 2.40 | 1 nonverbal IQ                                      | myopia                                                         |
| 4229 | Zhang C          | 2004 Epidemiology                     | USA         | 1 | 1 qua 4 vs 1     | 3.10 | 1 Plasma ascorbic acid concentrations               | gestational diabetes                                           |
| 4231 | Kahn RS          | 2004 Arch Pediatr Adolesc Med         | USA         | 1 | 1 qua 4 vs 1+2+3 | 9.20 | 1 parents mental health                             | high BPI-EXT score                                             |
| 4232 | Stattin P        | 2004 J Clin Oncol                     | Sweden      | 1 | 1 qua 4 vs 1     | 1.67 | 1 plasma peptide levels of IGF-I                    | prostate cancer                                                |
| 4234 | Jiang R          | 2004 Diabetes Care                    | USA         | 1 | 1 qua 4 vs 1     | 2.34 | 1 non-HDL cholesterol                               | cardiovascular disease                                         |
| 4238 | Rutter MK        | 2004 Circulation                      | UK          | 1 | 0 qua 4 vs 1     | 2.20 | 1 CRP levels                                        | CVD events                                                     |
| 4241 | Gago-Dominguez M | 2004 Carcinogenesis                   | USA         | 1 | 0 qua 4 vs 1+2+3 | 0.36 | 1 marine n-3 fatty acids                            | post-menopausal breast cancer                                  |
| 4244 | Arenillas JF     | 2004 Neurology                        | Spain       | 1 | 0 qua 4 vs 1     | 3.43 | 1 Lp(a) lipoprotein levels                          | greater extent of intracranial large-artery occlusive disease. |
| 4245 | Sprengle MD      | 2004 Chest                            | USA         | 1 | 0 qua 4 vs 1     | 5.47 | 1 physical component summary                        | death                                                          |
| 4249 | Kant AK          | 2004 J Nutr                           | USA         | 1 | 1 qua 4 vs 1     | 0.72 | 1 Recommended Foods and Behavior Score              | all-cause mortality                                            |
| 4250 | Maru S           | 2004 Am J Clin Nutr                   | Netherlands | 1 | 0 qua 4 vs 1     | 1.40 | 1 BMI                                               | mortality from all causes                                      |
| 4251 | Okamura T        | 2004 Am Heart J                       | Japan       | 1 | 0 qua 4 vs 1     | 2.55 | 1 resting heart rate (HR)                           | cardiovascular deaths                                          |
| 4252 | Hayashi T        | 2004 Ann Intern Med                   | USA         | 1 | 0 qua 4 vs 1     | 3.48 | 1 intra-abdominal fat area                          | hypertension                                                   |
| 4253 | Skuladottir H    | 2004 Lung Cancer                      | Denmark     | 1 | 0 qua 4 vs 1     | 0.35 | 1 intake of plant food                              | lung cancer                                                    |
| 4255 | Luchsinger JA    | 2004 Neurology                        | USA         | 0 | 1 qua 4 vs 1     | 1.30 | 0 homocysteine                                      | Alzheimer disease                                              |
| 4256 | Navas-Acien A    | 2004 Circulation                      | USA         | 1 | 1 qua 4 vs 1     | 2.88 | 0 Lead levels                                       | peripheral arterial disease                                    |
| 4257 | Page JH          | 2004 Cancer Epidemiol Biomarkers Prev | USA         | 0 | 1 qua 4 vs 1     | 0.92 | 0 DHEA                                              | breast cancer                                                  |
| 4260 | Boekholdt SM     | 2004 Arterioscler Thromb Vasc Biol    | Netherlands | 1 | 0 qua 4 vs 1     | 1.72 | 1 IL-8                                              | future CAD                                                     |
| 4261 | Sheehan J.       | 2004 Eur J Cardiovasc Prev Rehabil    | Ireland     | 1 | 0 qua 4 vs 1     | 2.14 | 1 corrected QT dispersion                           | cardiac death                                                  |
| 4264 | Oh JC            | 2004 Cancer Epidemiol Biomarkers Prev | USA         | 1 | 0 qua 4 vs 1     | 9.67 | 1 IGF-2                                             | endometrial cancer                                             |

|      |                 |                                       |             |   |                  |      |                                                                        |                                                |
|------|-----------------|---------------------------------------|-------------|---|------------------|------|------------------------------------------------------------------------|------------------------------------------------|
| 4267 | van Meurs JB    | 2004 N Engl J Med                     | Netherlands | 1 | 0 qua 4 vs 1+2+3 | 1.90 | 1 homocysteine level                                                   | fracture                                       |
| 4270 | Zhang C         | 2004 J Reprod Med                     | USA         | 1 | 0 qua 4 vs 1     | 12.8 | 1 daily vitamin C intake                                               | gestational diabetes mellitus                  |
| 4274 | Lin Y           | 2004 Int J Cancer                     | Japan       | 0 | 1 qua 4 vs 1     | 2.31 | 0 IGF-I levels                                                         | death from pancreatic cancer                   |
| 4275 | Butler LM       | 2004 Am J Respir Crit Care Med        | USA         | 1 | 0 qua 4 vs 1     | 0.61 | 1 nonstarch polysaccharides intake                                     | chronic respiratory symptoms                   |
| 4276 | Gunnarsdottir I | 2004 Eur J Clin Nutr                  | Iceland     | 1 | 0 qua 4 vs 1     | 0.70 | 1 birth weight                                                         | being above the 90th percentile of truncal fat |
| 4278 | Pelfrene E      | 2004 Soc Sci Med                      | Belgium     | 1 | 1 qua 4 vs 1     | 1.91 | 1 evel of job demands                                                  | use of benzodiazepines                         |
| 4279 | Wong TY         | 2004 Am J Epidemiol                   | Australia   | 0 | 1 qua 4 vs 1     | 0.93 | 0 retinal arteriole-to-venule ratio                                    | all-cause mortality                            |
| 4280 | Kim MK          | 2004 Int J Cancer                     | Japan       | 1 | 0 qua 4 vs 1     | 0.56 | 1 healthy pattern                                                      | gastric cancer                                 |
| 4283 | Blake GJ        | 2004 Arch Intern Med                  | USA         | 1 | 1 qua 4 vs 1+2+3 | 2.25 | 1 A(1c) levels                                                         | cardiovascular events                          |
| 4287 | Turner BJ       | 2004 Ann Intern Med                   | USA         | 1 | 0 qua 4 vs 1     | 0.79 | 1 physician visit adherence                                            | attending the first colon study                |
| 4288 | MacInnis RJ     | 2004 Cancer Epidemiol Biomarkers Prev | Australia   | 1 | 0 qua 4 vs 1     | 2.30 | 1 fat-free mass (FFM)                                                  | male colon cancer                              |
| 4294 | Schulze MB      | 2004 Diabetes Care                    | USA         | 1 | 0 qua 4 vs 1     | 2.62 | 1 CRP                                                                  | cardiovascular events                          |
| 4297 | Anderson JP     | 2004 Cancer                           | USA         | 1 | 1 qua 4 vs 1     | 1.86 | 1 height                                                               | ovarian cancer                                 |
| 4302 | Morange PE      | 2004 Circulation                      | France      | 1 | 0 qua 4 vs 1     | 3.04 | 1 plasma vWF levels                                                    | hard CHD                                       |
| 4303 | Horne BD        | 2004 Ann Epidemiol                    | USA         | 1 | 1 qua 4 vs 1     | 1.32 | 1 geographic Socio economic status measure-residential economic status | death/MI                                       |
| 4305 | Samelson EJ     | 2004 Am J Epidemiol                   | USA         | 1 | 1 qua 4 vs 1     | 0.73 | 1 metacarpal cortical area                                             | coronary heart disease                         |
| 4307 | Larsson SC      | 2004 J Natl Cancer Inst               | Sweden      | 1 | 1 qua 4 vs 1     | 0.67 | 0 dietary folate intake                                                | ovarian cancer                                 |
| 4308 | Panichi V       | 2004 Nephrol Dial Transplant          | Italy       | 1 | 1 qua 4 vs 1     | 5.20 | 1 IL-6                                                                 | death from all causes                          |
| 4311 | Hubbard JS      | 2004 Urology                          | USA         | 0 | 1 qua 4 vs 1     | 2.06 | 0 waist/hip ratio                                                      | prostate cancer                                |
| 4313 | Rosenthal AD    | 2004 Int J Obes Relat Metab Disord    | USA         | 1 | 0 qua 4 vs 1     | 2.57 | 1 body mass index                                                      | diabetes                                       |
| 4315 | Erlinger TP     | 2004 JAMA                             | USA         | 1 | 1 qua 4 vs 1     | 2.55 | 1 CRP                                                                  | colon cancer                                   |
| 4317 | Keinan-Boker L  | 2004 Am J Clin Nutr                   | Netherlands | 0 | 1 qua 4 vs 1     | 1.00 | 0 intakes of isoflavones                                               | breast cancer                                  |
| 4318 | Massy ZA        | 2004 Am J Physiol Renal Physiol       | France      | 1 | 0 qua 4 vs 1+2+3 | 3.30 | 1 plasma S-nitrosothiol concentrations                                 | cardiac events                                 |
| 4319 | Golden SH       | 2004 Diabetes Care                    | USA         | 1 | 0 qua 4 vs 1     | 1.63 | 1 depressive symptoms                                                  | Diabetes development                           |
| 4320 | Montonen J      | 2004 Diabetes Care                    | Finland     | 1 | 0 qua 4 vs 1     | 0.69 | 1 Vitamin E intake                                                     | type 2 diabetes                                |

|      |                |                                    |           |   |                  |      |                                                                                                                                                                                  |                                         |
|------|----------------|------------------------------------|-----------|---|------------------|------|----------------------------------------------------------------------------------------------------------------------------------------------------------------------------------|-----------------------------------------|
| 4321 | Takebayashi T  | 2004 Occup Environ Med             | Japan     | 1 | 0 qua 4 vs 1     | 3.90 | 1 six year mean TTCA                                                                                                                                                             | ischaemic findings                      |
| 4329 | Molyneux A     | 2004 Am J Epidemiol                | UK        | 1 | 0 qua 4 vs 1     | 1.78 | 1 smoking prevalence                                                                                                                                                             | incident smoking                        |
| 4331 | Church TS      | 2004 Diabetes Care                 | USA       | 1 | 1 qua 4 vs 1     | 4.50 | 1 fitness                                                                                                                                                                        | all-cause mortality                     |
| 4332 | Pankow JS      | 2004 Diabetes Care                 | USA       | 1 | 0 qua 4 vs 1     | 1.68 | 1 free fatty acids                                                                                                                                                               | type 2 diabetes                         |
| 4334 | Wolf M         | 2004 Diabetes Care                 | USA       | 1 | 1 qua 4 vs 1     | 4.90 | 1 leukocyte count                                                                                                                                                                | gestational diabetes mellitus           |
| 4337 | Wong TY        | 2004 Diabetes                      | Australia | 1 | 0 qua 4 vs 1+2+3 | 1.53 | 1 retinal venular diameter                                                                                                                                                       | gross proteinuria                       |
| 4340 | Engstrom G     | 2004 Arterioscler Thromb Vasc Biol | Sweden    | 1 | 1 qua 4 vs 1     | 3.20 | 1 ISPs (fibrinogen. orosomuroid. alpha1-antitrypsin. haptoglobin. and ceruloplasmin                                                                                              | abdominal aortic aneurysms              |
| 4341 | Sesso HD       | 2004 Am J Clin Nutr                | USA       | 1 | 1 qua 4 vs 1     | 0.62 | 0 plasma lycopene                                                                                                                                                                | Cardiovascular disease                  |
| 4342 | Rosengren A    | 2004 Eur Heart J                   | Sweden    | 1 | 0 qua 4 vs 1     | 0.45 | 1 social integration                                                                                                                                                             | coronary morbidity                      |
| 4351 | Lukanova A     | 2004 Int J Cancer                  | France    | 1 | 1 qua 4 vs 1     | 4.13 | 1 estradiol                                                                                                                                                                      | endometrial cancer                      |
| 4353 | Wannamethee SG | 2004 Diabetologia                  | UK        | 1 | 0 qua 4 vs 1     | 0.66 | 1 birthweight SD scores                                                                                                                                                          | HOMA insulin resistance score           |
| 4354 | Kilkinen A     | 2004 Int J Cancer                  | Finland   | 0 | 1 qua 4 vs 1     | 1.30 | 0 enterolactone                                                                                                                                                                  | breast cancer                           |
| 4377 | Guerra S       | 2004 Am J Respir Crit Care Med     | USA       | 1 | 0 qua 4 vs 1+2+3 | 4.50 | 1 IFNgamma production at 3 months                                                                                                                                                | developing recurrent wheezing           |
| 5001 | Gelber RP      | 2005 Am J Kidney Dis               | USA       | 1 | 0 qui 5 vs 1     | 1.45 | 1 BMI                                                                                                                                                                            | chronic kidney disease                  |
| 5006 | Jee SH         | 2004 Am J Epidemiol                | Korea     | 1 | 0 qui 5 vs 1     | 2.1  | 1 white blood cell count                                                                                                                                                         | atherosclerotic cardiovascular diseases |
| 5009 | Song Y         | 2004 Am J Cardiol                  | USA       | 0 | 1 qui 5 vs 1     | 0.87 | 0 magnesium intake                                                                                                                                                               | Cardiovascular disease                  |
| 5010 | Nothlings U    | 2005 J Natl Cancer Inst            | USA       | 1 | 0 qui 5 vs 1     | 1.68 | 1 daily intake of processed meat                                                                                                                                                 | pancreatic cancer                       |
| 5011 | Wright ME      | 2005 Cancer Causes Control         | USA       | 0 | 1 qui 5 vs 1     | 1.15 | 0 renal net acid excretion                                                                                                                                                       | bladder cancer                          |
| 5012 | Selvin E       | 2005 Arch Intern Med               | USA       | 1 | 1 qui 5 vs 1     | 2.37 | 1 Diabetic adults: HbA(1c) level                                                                                                                                                 | CHD                                     |
| 5013 | Kurth T        | 2005 Arch Intern Med               | USA       | 0 | 1 qui 5 vs 1     | 1.12 | 0 analgesic use                                                                                                                                                                  | hypertension                            |
| 5014 | Zhang X        | 2005 Arch Intern Med               | USA       | 1 | 0 qui 5 vs 1     | 0.63 | 1 soy protein intake                                                                                                                                                             | fracture                                |
| 5015 | Schulze MB     | 2005 Am J Clin Nutr                | Germany   | 1 | 0 qui 5 vs 1     | 3.09 | 1 Diet pattern. high in sugar-sweetened soft drinks. refined grains. diet soft drinks. and processed meat but low in wine. coffee. cruciferous vegetables. and yellow vegetables | diabetes                                |
| 5016 | Forman JP      | 2005 Hypertension                  | USA       | 0 | 1 qui 5 vs 1     | 0.98 | 0 vitamin D intake                                                                                                                                                               | incident hypertension                   |



|      |                    |                                       |             |   |              |      |                                                  |                                              |
|------|--------------------|---------------------------------------|-------------|---|--------------|------|--------------------------------------------------|----------------------------------------------|
| 5020 | Mommers M          | 2005 Cancer                           | Netherlands | 1 | 1 qui 5 vs 1 | 0.98 | 0 total vegetables intake                        | ovarian carcinoma                            |
| 5021 | Zhang SM           | 2005 Cancer Epidemiol Biomarkers Prev | USA         | 1 | 1 qui 5 vs 1 | 0.81 | 1 total folate intake                            | ER- tumors                                   |
| 5022 | Bertone-Johnson ER | 2005 Cancer Epidemiol Biomarkers Prev | USA         | 0 | 1 qui 5 vs 1 | 0.73 | 0 plasma levels of 25-hydroxyvitamin D [25(OH)D] | breast cancer                                |
| 5024 | Batty GD           | 2005 Br J Psychiatry                  | Denmark     | 1 | 0 qui 5 vs 1 | 1.70 | 1 early-life IQ                                  | subsequent psychiatric disorder in adulthood |
| 5025 | Ridker PM          | 2005 JAMA                             | USA         | 1 | 0 qui 5 vs 1 | 1.62 | 1 LDL-C                                          | future cardiovascular events                 |
| 5029 | Tsai CJ            | 2005 Gastroenterology                 | USA         | 1 | 0 qui 5 vs 1 | 1.35 | 1 dietary carbohydrate                           | cholecystectomy                              |
| 5031 | Myint PK           | 2005 Ann Epidemiol                    | UK          | 1 | 0 qui 5 vs 1 | 2.15 | 1 SF-36 scores                                   | all cause mortality                          |
| 5032 | Mucci LA           | 2005 Int J Cancer                     | USA         | 0 | 1 qui 5 vs 1 | 0.90 | 0 acrylamide intake                              | colorectal cancer                            |
| 5033 | Shai I             | 2005 Diabetologia                     | USA         | 1 | 1 qui 5 vs 1 | 1.95 | 1 lipoprotein (Lp)(a)                            | CHD                                          |
| 5034 | Mozaffarian D      | 2005 J Am Coll Cardiol                | USA         | 1 | 1 qui 5 vs 1 | 0.73 | 1 long-chain n-3 fatty acid intake               | CHF                                          |
| 5037 | Bertone-Johnson ER | 2005 Arch Intern Med                  | USA         | 1 | 0 qui 5 vs 1 | 0.59 | 1 total vitamin D intake                         | Premenstrual syndrome                        |
| 5038 | Lin J              | 2005 Cancer Causes Control            | USA         | 1 | 1 qui 5 vs 1 | 0.79 | 0 fruit intake                                   | colorectal cancer                            |
| 5039 | Sin DD             | 2005 Chest                            | Canada      | 1 | 0 qui 5 vs 1 | 3.36 | 1 FEV1                                           | ischemic heart disease                       |
| 5043 | Larsson SC         | 2005 Gastroenterology                 | Sweden      | 1 | 0 qui 5 vs 1 | 0.66 | 1 vitamin B6 intake                              | colorectal cancer                            |
| 5046 | Sesso HD           | 2005 Cancer Epidemiol Biomarkers Prev | USA         | 0 | 1 qui 5 vs 1 | 1.00 | 0 dietary lycopene                               | breast cancer                                |
| 5048 | Heidemann C        | 2005 Diabetologia                     | Germany     | 1 | 0 qui 5 vs 1 | 0.27 | 1 dietary pattern score                          | type 2 diabetes                              |
| 5049 | Tsai CJ            | 2005 Gut                              | USA         | 1 | 0 qui 5 vs 1 | 1.59 | 1 carbohydrate intake                            | symptomatic gall stone disease               |
| 5050 | Tsai CJ            | 2005 Arch Intern Med                  | USA         | 1 | 1 qui 5 vs 1 | 1.23 | 1 dietary intake of trans-fatty acids            | gallstone disease                            |
| 5051 | Lu M               | 2005 Am J Epidemiol                   | USA         | 1 | 1 qui 5 vs 1 | 1.10 | 0 total fat intake                               | cataract extraction                          |
| 5053 | Vrbova L           | 2005 J Negat Results Biomed           | Canada      | 0 | 1 qui 5 vs 1 | 1.03 | 0 income                                         | death                                        |
| 5055 | Slinin Y           | 2005 J Am Soc Nephrol                 | USA         | 1 | 0 qui 5 vs 1 | 1.08 | 1 calcium levels                                 | cardiovascular events                        |
| 5056 | Michaud DS         | 2005 J Natl Cancer Inst               | USA         | 0 | 1 qui 5 vs 1 | 1.32 | 0 prudent dietary pattern                        | pancreatic cancer                            |
| 5060 | Lin J              | 2005 Am J Epidemiol                   | USA         | 0 | 1 qui 5 vs 1 | 1.20 | 0 Intakes of total calcium                       | colorectal cancer                            |
| 5063 | Larsson SC         | 2005 Cancer Epidemiol Biomarkers Prev | Sweden      | 1 | 1 qui 5 vs 1 | 0.61 | 1 dietary folate intake                          | colon cancer                                 |
| 5064 | Schernhammer ES    | 2005 Cancer Epidemiol Biomarkers Prev | USA         | 1 | 1 qui 5 vs 1 | 1.00 | 0 IGF-I                                          | breast cancer                                |
| 5065 | Fung TT            | 2005 Int J Cancer                     | USA         | 1 | 0 qui 5 vs 1 | 1.44 | 1 Western pattern score                          | breast cancer                                |
| 5066 | Frost L            | 2005 Am J Clin Nutr                   | Denmark     | 0 | 1 qui 5 vs 1 | 0.91 | 0 caffeine consumption                           | atrial fibrillation or flutter               |

|      |              |                                          |             |   |                       |      |                                                 |                                                |
|------|--------------|------------------------------------------|-------------|---|-----------------------|------|-------------------------------------------------|------------------------------------------------|
| 5067 | Wang Y       | 2005 Am J Clin Nutr                      | USA         | 1 | 0 qui 5 vs 1          | 12.0 | 1 waist circumference                           | type 2 diabetes                                |
| 5068 | Alonso A     | 2004 Lipids                              | Spain       | 1 | 1 qui 5 vs 1          | 0.46 | 1 olive oil consumption                         | hypertension                                   |
| 5071 | Madsen TE    | 2005 Am J Nephrol                        | USA         | 1 | 0 qui 5 vs<br>1+2+3+4 | 1.90 | 1 model including NAF cytology                  | all-cause mortality                            |
| 5074 | Taylor EN    | 2005 Am J Kidney Dis                     | USA         | 1 | 0 qui 5 vs 1          | 1.28 | 1 docosahexaenoic acid<br>eicosapentaenoic acid | kidney stones                                  |
| 5076 | Hartman TJ   | 2005 J Nutr                              | USA         | 1 | 1 qui 5 vs 1          | 0.91 | 0 dietary calcium intake                        | adenoma recurrence                             |
| 5077 | Michaud DS   | 2005 Cancer Epidemiol<br>Biomarkers Prev | USA         | 1 | 1 qui 5 vs 1          | 1.32 | 0 Dietary glycemic load                         | colorectal cancer                              |
| 5078 | Flood A      | 2005 Cancer Epidemiol<br>Biomarkers Prev | USA         | 1 | 1 qui 5 vs 1          | 0.74 | 1 dietary calcium                               | colorectal cancer                              |
| 5080 | Rouillier P  | 2005 Alcohol Clin Exp Res                | France      | 1 | 0 qui 5 vs 1          | 1.45 | 1 Alcohol intake                                | Abnormal ApoB                                  |
| 5081 | van Gils CH  | 2005 JAMA                                | Netherlands | 0 | 1 qui 5 vs 1          | 0.98 | 0 total vegetables                              | breast cancer                                  |
| 5082 | Frost L      | 2005 Am J Clin Nutr                      | Denmark     | 1 | 0 qui 5 vs 1          | 1.44 | 1 n-3 fatty acids consumed from<br>fish         | atrial fibrillation or<br>flutter              |
| 5083 | Larsson SC   | 2005 JAMA                                | Sweden      | 1 | 1 qui 5 vs 1          | 0.59 | 1 magnesium intake                              | colorectal cancer                              |
| 5085 | Silvera SA   | 2005 Int J Cancer                        | USA         | 1 | 1 qui 5 vs 1          | 0.78 | 0 postmenopausal women:<br>glycemic index (GI)  | breast cancer                                  |
| 5086 | Adebamowo CA | 2005 Int J Cancer                        | USA         | 1 | 1 qui 5 vs 1          | 0.94 | 0 sum of flavonols intake                       | breast cancer                                  |
| 5087 | Knekt P      | 2004 Am J Clin Nutr                      | Finland     | 1 | 1 qui 5 vs 1          | 0.84 | 0 dietary intake for vitamin E                  | Coronary heart<br>disease                      |
| 5088 | Jensen MK    | 2004 Am J Clin Nutr                      | USA         | 1 | 0 qui 5 vs 1          | 0.82 | 1 whole-grain intake                            | Coronary heart<br>disease                      |
| 5089 | Taylor EN    | 2004 J Am Soc Nephrol                    | USA         | 1 | 0 qui 5 vs 1          | 0.69 | 1 dietary calcium                               | kidney stones                                  |
| 5090 | Wu K         | 2004 Cancer Causes Control               | USA         | 1 | 1 qui 5 vs 1          | 0.84 | 0 prudent pattern scores                        | colon cancer                                   |
| 5092 | Koenig W     | 2005 Clin Chem                           | Germany     | 1 | 0 qui 5 vs 1          | 2.27 | 1 cystatin C distribution                       | secondary<br>Cerebrovascular<br>disease events |
| 5093 | Fung TT      | 2004 Arch Intern Med                     | USA         | 1 | 0 qui 5 vs 1          | 1.49 | 1 Western pattern                               | type 2 diabetes in<br>women                    |
| 5094 | Khaw KT      | 2004 Am J Clin Nutr                      | UK          | 1 | 0 qui 5 vs 1          | 2.48 | 1 urinary sodium                                | systolic blood<br>pressure >= 160 mm<br>Hg     |
| 5095 | Hung HC      | 2004 J Natl Cancer Inst                  | USA         | 1 | 1 qui 5 vs 1          | 0.95 | 0 total fruit and vegetable intake              | major chronic disease                          |
| 5096 | Lin J        | 2004 Am J Epidemiol                      | USA         | 1 | 0 qui 5 vs 1          | 1.86 | 1 intake of fried foods                         | colorectal cancer                              |
| 5097 | Folsom AR    | 2004 Am J Epidemiol                      | USA         | 1 | 0 qui 5 vs 1          | 0.82 | 1 fish intake                                   | total mortality                                |
| 5098 | Wolk R       | 2004 J Am Coll Cardiol                   | USA         | 1 | 0 qui 5 vs 1          | 6.46 | 1 leptin levels                                 | future cardiovascular<br>events                |
| 5099 | Ford ES      | 2004 Eur J Clin Nutr                     | USA         | 1 | 1 qui 5 vs 1          | 0.68 | 1 grain consumption                             | elevated C-reactive<br>protein                 |

|                            |                                       |             |   |              |      |                                                       |                                  |
|----------------------------|---------------------------------------|-------------|---|--------------|------|-------------------------------------------------------|----------------------------------|
| 5100 Empana JP             | 2004 Circulation                      | France      | 1 | 0 qui 5 vs 1 | 2.60 | 1 sagittal abdominal diameter                         | sudden death                     |
| 5101 Frost L               | 2004 Arch Intern Med                  | Denmark     | 1 | 1 qui 5 vs 1 | 1.46 | 1 alcohol consumption                                 | atrial fibrillation or flutter   |
| 5103 Luo ZC                | 2004 Epidemiology                     | Canada      | 1 | 0 qui 5 vs 1 | 1.44 | 1 neighborhood-income                                 | small-for-gestational-age        |
| 5106 Tsai CJ               | 2005 Ann Intern Med                   | USA         | 1 | 0 qui 5 vs 1 | 0.82 | 1 cis unsaturated fats                                | gallstone disease                |
| 5108 Erkkila AT            | 2005 Eur J Clin Nutr                  | USA         | 1 | 1 qui 5 vs 1 | 0.79 | 1 phylloquinone intake                                | Coronary heart disease           |
| 5113 Hutchings A           | 2004 Med Care                         | UK          | 1 | 0 qui 5 vs 1 | 0.70 | 1 socioeconomic status                                | hospital mortality               |
| 5117 Singh SM              | 2004 CMAJ                             | Canada      | 1 | 0 qui 5 vs 1 | 1.38 | 1 Income                                              | Colorectal investigation         |
| 5118 Boekholdt SM          | 2004 Circulation                      | Netherlands | 1 | 0 qui 5 vs 1 | 1.43 | 1 plasma levels of cholesteryl ester transfer protein | coronary artery disease          |
| 5119 Alonso A              | 2004 Br J Nutr                        | Spain       | 1 | 1 qui 5 vs 1 | 0.58 | 1 vegetable consumption                               | undiagnosed hypertension         |
| 5120 Smith W               | 2004 Hypertension                     | Australia   | 1 | 0 qui 5 vs 1 | 2.60 | 1 retinal arteriolar narrowing                        | severe hypertension              |
| 5122 Chen H                | 2004 Am J Epidemiol                   | USA         | 0 | 1 qui 5 vs 1 | 1.00 | 0 Folate intake                                       | Parkinson's disease              |
| 5124 Schaumberg DA         | 2004 Am J Clin Nutr                   | USA         | 0 | 1 qui 5 vs 1 | 0.95 | 0 dietary glycemic load                               | cataract extraction              |
| 5125 Schulze MB            | 2004 Am J Clin Nutr                   | USA         | 1 | 1 qui 5 vs 1 | 1.59 | 1 glycemic index                                      | diabetes                         |
| 5127 Leung H               | 2004 J Hypertens                      | Australia   | 1 | 0 qui 5 vs 1 | 2.40 | 1 current DBP                                         | Generalized arteriolar narrowing |
| 5129 Oh K                  | 2004 Cancer Epidemiol Biomarkers Prev | USA         | 0 | 1 qui 5 vs 1 | 1.11 | 0 glycemic index                                      | colorectal adenoma               |
| 5130 Cho E                 | 2004 J Natl Cancer Inst               | USA         | 1 | 1 qui 5 vs 1 | 0.86 | 1 milk intake                                         | colorectal cancer                |
| 5131 Tsai CJ               | 2004 Am J Gastroenterol               | USA         | 1 | 1 qui 5 vs 1 | 0.87 | 1 total dietary fiber intake                          | cholecystectomy                  |
| 5132 Fung TT               | 2004 Stroke                           | USA         | 1 | 1 qui 5 vs 1 | 1.58 | 1 Western pattern                                     | total strokes                    |
| 5133 Wright ME             | 2004 Am J Epidemiol                   | USA         | 1 | 1 qui 5 vs 1 | 0.84 | 1 Antioxidant diet index                              | Lung cancer                      |
| 5134 Tsai CJ               | 2004 Am J Epidemiol                   | USA         | 1 | 1 qui 5 vs 1 | 1.00 | 0 dietary total protein intake                        | cholecystectomy                  |
| 5135 Zeleniuch-Jacquotte A | 2004 Br J Cancer                      | USA         | 0 | 1 qui 5 vs 1 | 1.70 | 0 enterolactone                                       | breast cancer                    |
| 5138 Leitzmann MF          | 2004 Am J Clin Nutr                   | USA         | 1 | 1 qui 5 vs 1 | 2.02 | 1 ALA from nonanimal sources                          | prostate cancer                  |
| 5141 Hirvonen T            | 2004 Eur J Epidemiol                  | Finland     | 1 | 1 qui 5 vs 1 | 0.86 | 1 Dietary intake of flavonols and flavones            | intermittent claudication        |
| 5143 Hannan LM             | 2004 Cancer Epidemiol Biomarkers Prev | USA         | 1 | 1 qui 5 vs 1 | 0.70 | 0 total physical activity                             | ovarian cancer                   |
| 5144 Stack AG              | 2004 Kidney Int                       | USA         | 1 | 0 qui 5 vs 1 | 1.44 | 1 BMI                                                 | death                            |
| 5145 Greisenegger S        | 2004 Stroke                           | Austria     | 1 | 0 qui 5 vs 1 | 2.60 | 1 mean platelet volume                                | severe stroke                    |
| 5149 Kang JH               | 2004 Am J Clin Nutr                   | USA         | 1 | 1 qui 5 vs 1 | 0.90 | 0 total fat                                           | primary open-angle glaucoma      |

|      |                       |                                       |           |   |                    |      |                                            |                                       |
|------|-----------------------|---------------------------------------|-----------|---|--------------------|------|--------------------------------------------|---------------------------------------|
| 5151 | Richardson DB         | 2004 Arch Pediatr Adolesc Med         | USA       | 1 | 1 qui 5 vs 1       | 2.15 | 1 adult hemoglobin level                   | sudden infant death syndrome          |
| 5153 | Holmes MD             | 2004 Am J Epidemiol                   | USA       | 0 | 1 qui 5 vs 1       | 0.97 | 0 carbohydrate intake                      | breast cancer                         |
| 5154 | Yang G                | 2004 Eur J Clin Nutr                  | USA       | 1 | 1 qui 5 vs 1       | 0.51 | 1 intake of tofu and other soy products    | glycosuria                            |
| 5155 | Klein R               | 2004 Am J Ophthalmol                  | USA       | 1 | 0 qui 5 vs 1       | 1.93 | 1 generalized retinal arteriolar narrowing | retinal pigment epitheldepigmentation |
| 5157 | Chen H                | 2004 Am J Epidemiol                   | USA       | 1 | 1 qui 5 vs 1       | 1.90 | 1 waist circumference                      | Parkinson's disease                   |
| 5158 | Hu FB                 | 2004 Diabetes                         | USA       | 1 | 0 qui 5 vs 1       | 1.64 | 1 TNF-alphaR2                              | type 2 diabetes                       |
| 5160 | Wong TY               | 2004 Ann Intern Med                   | Australia | 1 | 0 qui 5 vs 1       | 1.62 | 1 arteriole-to-venule ratios               | hypertension                          |
| 5162 | Al-Delaimy WK         | 2004 J Am Coll Nutr                   | USA       | 1 | 1 qui 5 vs 1       | 0.73 | 1 total magnesium intake                   | Coronary heart disease                |
| 5163 | Jiang R               | 2004 JAMA                             | USA       | 1 | 1 qui 5 vs 1       | 2.68 | 1 Ferritin                                 | Type 2 diabetes                       |
| 5165 | Zylberstein DE        | 2004 Circulation                      | Sweden    | 1 | 0 qui 5 vs 1+2+3+4 | 1.86 | 1 Total Homocysteine                       | acute myocardial infarction           |
| 5166 | Pell JP               | 2004 Am J Epidemiol                   | UK        | 1 | 0 qui 5 vs 1+2+3+4 | 1.29 | 1 Birth weight                             | Maternal cerebrovascular events       |
| 5167 | Higginbotham S        | 2004 J Natl Cancer Inst               | USA       | 1 | 1 qui 5 vs 1       | 2.85 | 1 dietary glycemic load                    | colorectal cancer                     |
| 5169 | McKeown NM            | 2004 Diabetes Care                    | USA       | 1 | 0 qui 5 vs 1       | 0.62 | 1 cereal fiber                             | metabolic syndrome                    |
| 5171 | Higginbotham S        | 2004 Cancer Epidemiol Biomarkers Prev | USA       | 1 | 1 qui 5 vs 1       | 1.01 | 0 glycemic load                            | breast cancer risk                    |
| 5172 | Mannisto S            | 2004 Cancer Epidemiol Biomarkers Prev | USA       | 1 | 1 qui 5 vs 1       | 0.98 | 0 beta-Carotene intake                     | lung cancer                           |
| 5174 | Munger KL             | 2004 Neurology                        | USA       | 1 | 1 qui 5 vs 1       | 0.67 | 0 total vitamin D intake                   | multiple sclerosis                    |
| 5177 | Zeleniuch-Jacquotte A | 2004 Br J Cancer                      | USA       | 1 | 1 qui 5 vs 1       | 2.49 | 1 oestradiol                               | breast cancer                         |
| 5178 | Mattsson I            | 2004 Br J Cancer                      | Sweden    | 1 | 0 qui 5 vs 1       | 0.58 | 1 fibre intakes                            | breast cancer                         |
| 5180 | Song Y                | 2004 Diabetes Care                    | USA       | 1 | 0 qui 5 vs 1       | 0.89 | 1 Magnesium intake                         | Type 2 diabetes                       |
| 5186 | Jiang R               | 2004 Am J Clin Nutr                   | USA       | 1 | 1 qui 5 vs 1       | 1.28 | 1 heme iron from red meat                  | type 2 diabetes                       |
| 5188 | He K                  | 2004 Stroke                           | USA       | 1 | 0 qui 5 vs 1       | 0.71 | 1 intake of folate                         | ischemic stroke                       |
| 5191 | Stattin P             | 2004 Int J Cancer                     | Sweden    | 0 | 1 qui 5 vs 1       | 0.80 | 0 total testosterone                       | prostate cancer                       |
| 5193 | Miller AB             | 2004 Int J Cancer                     | Germany   | 1 | 0 qui 5 vs 1       | 0.60 | 1 fruit consumption                        | lung cancer                           |
| 5194 | Lukanova A            | 2004 Int J Cancer                     | France    | 1 | 1 qui 5 vs 1       | 4.76 | 1 C-peptide                                | Endometrial cancer                    |
| 3003 | Sornay-Rendu          | 2005 J Bone Miner Res                 | France    | 1 | 0 ter 3 vs 1+2     | 1.45 | 1 bone loss                                | fractures                             |
| 3004 | Pell JP               | 2005 Eur Heart J                      | UK        | 1 | 0 ter 3 vs 1       | 0.60 | 1 year of arrest                           | death after cardiopulmonary arrest    |
| 3006 | De Sutter J           | 2005 Eur Heart J                      | Belgium   | 1 | 0 ter 3 vs 1       | 3.24 | 1 NT-pro-BNP                               | coronary events                       |

|      |                   |                                       |             |   |                |      |                                                                 |                                            |
|------|-------------------|---------------------------------------|-------------|---|----------------|------|-----------------------------------------------------------------|--------------------------------------------|
| 3007 | Golden SH         | 2005 Psychoneuroendocrinology         | USA         | 1 | 1 ter 3 vs 1   | 1.34 | 1 trait anger temperament scores                                | T2DM                                       |
| 3008 | Eisner MD         | 2005 Thorax                           | USA         | 1 | 0 ter 3 vs 1   | 3.61 | 1 Nicotine exposure                                             | hospital admission due to asthma           |
| 3013 | Harville EW       | 2005 J Womens Health (Larchmt)        | USA         | 0 | 1 ter 3 vs 1   | 1.40 | 0 overall stress                                                | Bacterial vaginosis                        |
| 3014 | Khan MM.          | 2005 Int J Environ Health Res         | Japan       | 1 | 0 ter 3 vs 1   | 2.12 | 1 GOT                                                           | longer duration of having arsenicosis      |
| 3015 | Touvier M         | 2005 J Natl Cancer Inst               | France      | 1 | 1 ter 3 vs 1   | 0.80 | 0 dietary intake of beta carotene                               | all-smoking related cancers                |
| 3017 | Yende S           | 2005 Am J Respir Crit Care Med        | USA         | 1 | 0 ter 3 vs 1   | 1.60 | 1 TNF                                                           | Hospitalization due to pneumonia           |
| 3018 | Koren-Morag N     | 2005 Am J Med                         | Israel      | 1 | 0 ter 3 vs 1   | 1.55 | 1 WBC                                                           | ischemic cerebrovascular disease           |
| 3019 | Durairaj L        | 2005 Chest                            | USA         | 1 | 1 ter 3 vs 1   | 0.68 | 1 hospital volume                                               | mortality in GI diagnoses                  |
| 3020 | Kawamoto R        | 2005 Intern Med                       | Japan       | 1 | 0 ter 3 vs 1   | 1.66 | 1 levels of serum uric acid                                     | intima-media thickness                     |
| 3023 | Tarnow L          | 2005 Scand J Clin Lab Invest Suppl    | Denmark     | 1 | 1 ter 3 vs 1   | 2.64 | 1 PIGF                                                          | cardiovascular morbidity                   |
| 3024 | Schuling WJ.      | 2005 Neurosurgery                     | Netherlands | 1 | 0 ter 3 vs 1   | 30.9 | 1 acute physiology score II in subarachnoid hemorrhage patients | poor outcome after subarachnoid hemorrhage |
| 3025 | Pena de la Vega L | 2005 Mayo Clin Proc                   | USA         | 1 | 0 ter 3 vs 1+2 | 2.47 | 1 PF4-heparin antibody                                          | all cause mortality                        |
| 3032 | Van Den Brink CL  | 2005 Disabil Rehabil                  | Netherlands | 1 | 1 ter 3 vs 1   | 0.46 | 1 total physical activity                                       | disability                                 |
| 3033 | Storti KL         | 2005 Prev Med                         | USA         | 1 | 0 ter 3 vs 1   | 1.59 | 1 physical activity                                             | development of gallstone disease           |
| 3034 | Wark PA           | 2005 Cancer Epidemiol Biomarkers Prev | Netherlands | 1 | 1 ter 3 vs 1   | 0.46 | 1 Fruit consumption                                             | hMLH1 protein-deficient colon cancer       |
| 3036 | van der A DL      | 2005 Stroke                           | Netherlands | 1 | 1 ter 3 vs 1   | 1.45 | 0 ferritin levels                                               | stroke                                     |
| 3038 | Rashidkhani B     | 2005 J Nutr                           | Sweden      | 1 | 1 ter 3 vs 1   | 0.81 | 0 healthy pattern diet                                          | renal cell carcinoma                       |
| 3039 | Boyapati SM       | 2005 Breast Cancer Res Treat          | USA         | 0 | 1 ter 3 vs 1   | 0.99 | 0 soy intake                                                    | disease-free breast cancer survival        |
| 3041 | Fujiwara Y        | 2005 J Gerontol A Biol Sci Med Sci    | Japan       | 1 | 0 ter 3 vs 1+2 | 4.70 | 1 Pulse pressure                                                | Poor cognitive function                    |
| 3042 | Giles LC          | 2005 J Epidemiol Community Health     | Australia   | 1 | 0 ter 3 vs 1   | 0.78 | 1 friends network                                               | survival time                              |
| 3045 | Chiu CJ           | 2005 Am J Clin Nutr                   | USA         | 1 | 0 ter 3 vs 1   | 2.46 | 1 carbohydrate intake                                           | cortical opacities                         |
| 3047 | Tripepi G         | 2005 J Am Soc Nephrol                 | Italy       | 1 | 0 ter 3 vs 1   | 2.5  | 1 serum IL-6                                                    | all cause mortality                        |
| 3048 | van Hecke MV      | 2005 Diabetologia                     | Netherlands | 1 | 0 ter 3 vs 1   | 2.2  | 1 inflammatory dysfunction                                      | retinopathy                                |

|      |                       |                                       |             |   |                |      |                                                      |                                      |
|------|-----------------------|---------------------------------------|-------------|---|----------------|------|------------------------------------------------------|--------------------------------------|
| 3049 | Mangtani P            | 2005 Prev Med                         | UK          | 1 | 0 ter 3 vs 1   | 0.87 | 1 deprivation                                        | influenza vaccine uptake             |
| 3054 | Djousse L             | 2005 J Am Coll Cardiol                | USA         | 1 | 1 ter 3 vs 1   | 0.59 | 1 linolenic acid                                     | rate-adjustd QT interval+O97         |
| 3055 | Tseng M               | 2005 Am J Clin Nutr                   | USA         | 1 | 1 ter 3 vs 1   | 2.20 | 1 dairy food intake                                  | prostate cancer                      |
| 3056 | Haumer M              | 2005 J Vasc Surg                      | Austria     | 1 | 0 ter 3 vs 1   | 1.83 | 1 neutrophil counts                                  | all major cardiovascular events      |
| 3060 | Singh JA              | 2005 Semin Arthritis Rheum            | USA         | 1 | 0 ter 3 vs 1   | 1.49 | 1 physical component summary scale                   | any hospitalization                  |
| 3065 | Salvarani C           | 2005 Arthritis Rheum                  | Italy       | 1 | 1 ter 3 vs 1   | 0.11 | 1 levels of ESR                                      | development of permanent visual loss |
| 3066 | Mallamaci F           | 2005 Am J Kidney Dis                  | Italy       | 1 | 0 ter 3 vs 1   | 1.72 | 1 homocysteine levels                                | VA thrombosis                        |
| 3067 | Yamagata H            | 2005 Diabetes Care                    | Japan       | 1 | 0 ter 3 vs 1   | 3.10 | 1 fasting plama glucose levels                       | gastric cancer                       |
| 3070 | Wakai K               | 2005 Nutr Cancer                      | Japan       | 1 | 1 ter 3 vs 1   | 0.34 | 1 serum carotenoids. retinol. and tocopherols        | colorectal cancer                    |
| 3071 | Cherubini A           | 2005 Neurobiol Aging                  | Italy       | 1 | 0 ter 3 vs 1   | 2.60 | 1 plasma vitamin E levels                            | dementia                             |
| 3072 | Weinstein SJ          | 2005 J Natl Cancer Inst               | USA         | 0 | 1 ter 3 vs 1   | 0.49 | 0 alpha-tocopherol                                   | prostate cancer                      |
| 3073 | Rossi R               | 2005 Diabetes Care                    | Italy       | 1 | 0 ter 3 vs 1   | 5.87 | 1 flow-mediated dialation of the brachial artery     | incident T2DM                        |
| 3074 | Olijhoek JK           | 2005 Diabetes Care                    | Netherlands | 0 | 1 ter 3 vs 1   | 0.70 | 0 homeostasis model assessment of insulin resistance | coronary collaterals                 |
| 3075 | De Bacquer D          | 2005 Am J Epidemiol                   | Belgium     | 1 | 0 ter 3 vs 1   | 2.40 | 1 social support scale                               | coronary heart disease incidence     |
| 3077 | Houston DK            | 2005 Am J Clin Nutr                   | USA         | 1 | 0 ter 3 vs 1   | 0.60 | 1 dairy intakes                                      | impaired activities of daily living  |
| 3078 | Kurzius-Spencer M     | 2005 Pediatr Allergy Immunol          | USA         | 1 | 0 ter 3 vs 1   | 2.28 | 1 serum IgE production                               | infant eczema                        |
| 3082 | Platek M              | 2005 Cancer Epidemiol Biomarkers Prev | USA         | 0 | 1 ter 3 vs 1   | 1.60 | 0 serum fructosamine                                 | breast cancer                        |
| 3086 | Chao A                | 2005 JAMA                             | USA         | 1 | 0 ter 3 vs 1   | 1.50 | 1 consumption of processed meat                      | distal colon cancer                  |
| 3087 | St-Pierre AC          | 2005 Arterioscler Thromb Vasc Biol    | Canada      | 0 | 1 ter 3 vs 1   | 0.76 | 0 LDL-C                                              | ischemic heart disease               |
| 3088 | Ulvik A               | 2004 Cancer Epidemiol Biomarkers Prev | Norway      | 1 | 0 ter 3 vs 1   | 1.32 | 1 serum total homocysteine                           | colorectal cancer                    |
| 3089 | Tolmunen T            | 2004 Am J Clin Nutr                   | Finland     | 1 | 0 ter 3 vs 1   | 2.30 | 1 serum concentrations of total homocysteine         | depression                           |
| 3090 | Wang AY               | 2004 J Am Soc Nephrol                 | Hong Kong   | 1 | 0 ter 3 vs 1   | 4.19 | 1 resting energy expenditure                         | all-cause mortality                  |
| 3093 | Schillinger           | 2004 Thromb Haemost                   | Austria     | 1 | 0 ter 3 vs 1+2 | 0.39 | 1 Heparin cofactor II activity                       | Instent restenosis                   |
| 3094 | Zeleniuch-Jacquotte A | 2005 Int J Cancer                     | USA         | 0 | 1 ter 3 vs 1   | 1.10 | 0 levels of estradiol                                | breast carcinoma in situ             |

|      |                        |                                       |             |   |                |      |                                                                     |                                                                           |
|------|------------------------|---------------------------------------|-------------|---|----------------|------|---------------------------------------------------------------------|---------------------------------------------------------------------------|
| 3096 | Louis GM               | 2005 Hum Reprod                       | USA         | 1 | 0 ter 3 vs 1   | 3.77 | 1 anti-estrogenic polychlorinated biphenyl                          | endometriosis                                                             |
| 3102 | Qiu C                  | 2004 Epidemiology                     | Sweden      | 1 | 1 ter 3 vs 1   | 2.40 | 0 Extremely-low-frequency magnetic field lifetime average exposure. | Alzheimer's disease                                                       |
| 3106 | Ramos MI               | 2004 Am J Clin Nutr                   | USA         | 1 | 0 ter 3 vs 1   | 2.04 | 1 folate status                                                     | Center for Epidemiologic Studies Depression Scale (CES-D) score $\geq 16$ |
| 3110 | Qiu C                  | 2004 Paediatr Perinat Epidemiol       | USA         | 1 | 0 ter 3 vs 1   | 3.50 | 1 CRP                                                               | gestational diabetes                                                      |
| 3111 | Jowett SL              | 2004 Gut                              | UK          | 1 | 0 ter 3 vs 1   | 3.20 | 1 Consumption of meat                                               | relapse of ulcerative colitis                                             |
| 3112 | Micheli A              | 2004 Int J Cancer                     | Italy       | 1 | 1 ter 3 vs 1   | 2.85 | 1 free testosterone levels                                          | breast cancer                                                             |
| 3113 | Rajala U               | 2005 J Hum Hypertens                  | Finland     | 1 | 0 ter 3 vs 1+2 | 3.10 | 1 systolic BP                                                       | systolic BP                                                               |
| 3115 | Ninomiya T             | 2004 Am J Kidney Dis                  | Japan       | 1 | 1 ter 3 vs 1   | 2.09 | 0 total Homocysteine levels                                         | chronic kidney disease                                                    |
| 3116 | Nagel G                | 2005 Eur J Clin Nutr                  | Germany     | 1 | 0 ter 3 vs 1   | 1.73 | 1 margarine intake                                                  | asthma                                                                    |
| 3120 | Voutilainen S          | 2004 Am J Clin Nutr                   | Finland     | 1 | 1 ter 3 vs 1   | 0.35 | 1 serum folate concentrations                                       | acute coronary events                                                     |
| 3121 | Cohen S                | 2004 Psychosom Med                    | USA         | 1 | 0 ter 3 vs 1   | 3.70 | 1 childhood years during which their parents owned their home       | susceptibility to colds                                                   |
| 3122 | Borugian MJ            | 2004 Cancer Epidemiol Biomarkers Prev | Canada      | 1 | 1 ter 3 vs 1   | 1.90 | 0 levels of insulin                                                 | survival after breast cancer diagnosis                                    |
| 3123 | Goderie-Plomp HW       | 2004 J Clin Endocrinol Metab          | Netherlands | 1 | 0 ter 3 vs 1   | 2.10 | 1 serum estradiol                                                   | vertebral fractures                                                       |
| 3125 | Jansen MC              | 2004 Nutr Cancer                      | Netherlands | 1 | 0 ter 3 vs 1+2 | 0.64 | 1 Variety in vegetable intake                                       | Total cancers                                                             |
| 3128 | Olivot JM              | 2004 Stroke                           | France      | 1 | 0 ter 3 vs 1   | 0.56 | 1 Soluble TM concentration                                          | brain infarctions                                                         |
| 3131 | Nagata C               | 2004 Stroke                           | Japan       | 1 | 1 ter 3 vs 1   | 2.33 | 1 sodium intake                                                     | death from total stroke                                                   |
| 3134 | Kiechl S               | 2004 Circulation                      | Austria     | 1 | 0 ter 3 vs 1   | 2.20 | 1 level of osteoprotegerin                                          | cardiovascular disease                                                    |
| 3135 | Cicuttini FM           | 2004 Ann Rheum Dis                    | Australia   | 1 | 0 ter 3 vs 1   | 7.10 | 1 tibial cartilage loss                                             | knee replacement                                                          |
| 3140 | Sieri S                | 2004 Cancer Epidemiol Biomarkers Prev | Italy       | 1 | 0 ter 3 vs 1   | 0.66 | 1 salad vegetables pattern                                          | breast cancer                                                             |
| 3142 | Zhang X                | 2004 Int J Obes Relat Metab Disord    | USA         | 1 | 1 ter 3 vs 1   | 9.00 | 1 Body mass index                                                   | CHD                                                                       |
| 3143 | Hadjadj S              | 2004 Diabetes Metab                   | France      | 1 | 1 ter 3 vs 1+2 | 2.01 | 1 triglyceride levels                                               | progression of diabetic nephropathy                                       |
| 3144 | Stolzenberg-Solomon RZ | 2004 Cancer Epidemiol Biomarkers Prev | USA         | 0 | 1 ter 3 vs 1   | 0.67 | 0 IGF-1                                                             | pancreatic cancer                                                         |
| 3145 | Shankar A              | 2004 Am J Hypertens                   | USA         | 1 | 0 ter 3 vs 1   | 1.70 | 1 WBC count                                                         | Hypertension                                                              |
| 3147 | Mishra GD              | 2004 Soc Sci Med                      | UK          | 1 | 0 ter 3 vs 1   | 0.79 | 1 socioeconomic status                                              | death                                                                     |

|      |                    |                                       |             |   |              |      |                                                  |                                                                     |
|------|--------------------|---------------------------------------|-------------|---|--------------|------|--------------------------------------------------|---------------------------------------------------------------------|
| 3148 | Johansson L        | 2004 Stroke                           | Sweden      | 1 | 0 ter 3 vs 1 | 0.27 | 1 level of VWF                                   | intracerebral hemorrhage                                            |
| 3149 | Ala-Mursula L      | 2004 Occup Environ Med                | Finland     | 1 | 0 ter 3 vs 1 | 1.90 | 1 worktime control                               | poor self rated health                                              |
| 3150 | Haim M             | 2004 Arch Intern Med                  | Israel      | 1 | 0 ter 3 vs 1 | 1.47 | 1 WBC count                                      | total mortality                                                     |
| 3153 | Sanchez PL         | 2004 Heart                            | Spain       | 1 | 0 ter 3 vs 1 | 4.51 | 1 C reactive protein                             | cardiovascular death                                                |
| 3154 | Ballantyne CM      | 2004 Circulation                      | USA         | 1 | 0 ter 3 vs 1 | 1.78 | 1 Lp-PLA2                                        | incident CHD                                                        |
| 3157 | Tseng M            | 2004 Cancer Epidemiol Biomarkers Prev | USA         | 0 | 1 ter 3 vs 1 | 0.60 | 0 Southern pattern diet                          | prostate cancer                                                     |
| 3160 | Merlino LA         | 2004 Arthritis Rheum                  | USA         | 1 | 1 ter 3 vs 1 | 0.67 | 1 vitamin D intake                               | rheumatoid arthritis                                                |
| 3162 | Meyerhardt JA      | 2004 J Clin Oncol                     | USA         | 1 | 1 ter 3 vs 1 | 1.94 | 1 hospital surgical volume                       | cancer recurrence                                                   |
| 2002 | Bak H              | 2005 Int J Cancer                     | Denmark     | 1 | 1 medians    | 1.61 | 1 DNA adduct levels                              | lung cancer                                                         |
| 2011 | Polychronopoulos E | 2005 Lipids Health Dis                | Greece      | 1 | 0 medians    | 0.77 | 1 Mediterranean diet                             | hypercholesterolemia                                                |
| 2021 | Olson MB           | 2005 Psychosom Med                    | USA         | 1 | 0 medians    | 1.35 | 1 total Cook Medley Hostility Score              | adverse event                                                       |
| 2038 | Verma A            | 2005 Heart                            | USA         | 1 | 0 medians    | 2.19 | 1 single pre-implant BNP level                   | ICD therapies                                                       |
| 2048 | Shalak LF          | 2005 J Perinatol                      | USA         | 1 | 0 medians    | 2.80 | 1 rectal temperature                             | admission to NICU                                                   |
| 2051 | Ceschi M           | 2005 Carcinogenesis                   | Switzerland | 1 | 0 medians    | 0.67 | 1 intake level of n-6 fatty acids                | breast cancer                                                       |
| 2065 | George DJ          | 2005 Clin Cancer Res                  | USA         | 1 | 0 medians    | 1.38 | 1 Plasma IL-6 level                              | hormone-refractory prostate cancer progression and patient survival |
| 2088 | Gaede P            | 2005 Diabetologia                     | Denmark     | 1 | 0 medians    | 4.40 | 1 plasma N-terminal probrain natriuretic peptide | cardiovascular disease                                              |
| 2089 | Tarnow L           | 2005 Diabetologia                     | Denmark     | 1 | 0 medians    | 3.86 | 1 plasma N-terminal probrain natriuretic peptide | any cause death                                                     |
| 2112 | Tolmunen T         | 2004 Psychother Psychosom             | Finland     | 1 | 0 medians    | 3.04 | 1 intake of folate                               | depression diagnosis                                                |
| 2172 | Mayne ST           | 2004 J Am Coll Nutr                   | USA         | 1 | 0 medians    | 0.53 | 1 plasma lycopene                                | total mortality                                                     |



## References:

- 1 Adebamowo CA CE. Sampson L. Katan MB. Spiegelman D. Willett WC. Holmes MD. Dietary flavonols and flavonol-rich foods intake and the risk of breast cancer. *Int J Cancer*. 2005;114:628-633.
- 2 Al Snih S MK. Ottenbacher KJ. Raji MA. Hand grip strength and incident ADL disability in elderly Mexican Americans over a seven-year period. *Aging Clin Exp Res*. 2004;16:481-486.
- 3 Ala-Mursula L VJ. Pentti J. Kivimaki M. Effect of employee worktime control on health: a prospective cohort study. *Occup Environ Med*. 2004;61:254-261.
- 4 Al-Delaimy WK RE. Willett WC. Stampfer MJ. Hu FB. Magnesium intake and risk of coronary heart disease among men. *J Am Coll Nutr*. 2004;23:63-70.
- 5 Alonso A dIFC. Martin-Arnau AM. de Irala J. Martinez JA. Martinez-Gonzalez MA. Fruit and vegetable consumption is inversely associated with blood pressure in a Mediterranean population with a high vegetable-fat intake: the Seguimiento Universidad de Navarra (SUN) Study. *Br J Nutr*. 2004;92:311-319.
- 6 Alonso A M-GM. Olive oil consumption and reduced incidence of hypertension: the SUN study. *Lipids*. 2005;39:1233-1238.
- 7 Anderson JP RJ. Folsom AR. Anthropometric variables. physical activity. and incidence of ovarian cancer: The Iowa Women's Health Study. *Cancer*. 2004;100:1515-1521.
- 8 Arenillas JF MC. Chacon P. Rovira A. Montaner J. Coscojuela P. Sanchez E. Quintana M. Alvarez-Sabin J. High lipoprotein (a). diabetes. and the extent of symptomatic intracranial atherosclerosis. *Neurology*. 2004;63:27-32.
- 9 Bak H AH. Thomsen BL. Tjonneland A. Overvad K. Vogel U. Raaschou-Nielsen O. Loft S. Bulky DNA adducts as risk indicator of lung cancer in a Danish case-cohort study. *Int J Cancer*. 2006;118:1618-1622.
- 10 Ballantyne CM HR. Bang H. Coresh J. Folsom AR. Heiss G. Sharrett AR. Lipoprotein-associated phospholipase A2. high-sensitivity C-reactive protein. and risk for incident coronary heart disease in middle-aged men and women in the Atherosclerosis Risk in Communities (ARIC) study. *Circulation*. 2004;109:837-842.
- 11 Batty GD ME. Osler M. Childhood IQ in relation to later psychiatric disorder: evidence from a Danish birth cohort study. *Br J Psychiatry*. 2005;187:180-181.
- 12 Baumgartner KB HW. Baumgartner RN. Crumley DD. Gilliland FD. McTiernan A. Bernstein L. Ballard-Barbash R. Association of body composition and weight history with breast cancer prognostic markers: divergent pattern for Hispanic and non-Hispanic White women. *Am J Epidemiol*. 2004;160:1087-1097.
- 13 Bautista LE VL. Arenas IA. Gamarra G. Independent association between inflammatory markers (C-reactive protein. interleukin-6. and TNF-alpha) and essential hypertension. *J Hum Hypertens*. 2005;19:149-154.
- 14 Beddhu S RN. Pappas LM. Normalization of protein intake by body weight and the associations of protein intake with nutritional status and survival. *J Ren Nutr*. 2005;15:387-397.

- 15 Benner JS PM. Smith TW. Bullano MF. Willey VJ. Williams SA. Association between short-term effectiveness of statins and long-term adherence to lipid-lowering therapy. *Am J Health Syst Pharm.* 2005;62:1468-1475.
- 16 Bergelt C CJ. Prescott E. Gronbaek M. Koch U. Johansen C. Vital exhaustion and risk for cancer: a prospective cohort study on the association between depressive feelings, fatigue, and risk of cancer. *Cancer Causes Control.* 2005;104:1288-1295.
- 17 Bergink AP UA. Van Leeuwen JP. Hofman A. Verhaar JA. Pols HA. Bone mineral density and vertebral fracture history are associated with incident and progressive radiographic knee osteoarthritis in elderly men and women: The Rotterdam Study. *Bone.* 2005;37:446-456.
- 18 Berndt SI CH. Landis PK. Hallfrisch J. Rohrmann S. Metter EJ. Platz EA. Prediagnostic plasma vitamin C levels and the subsequent risk of prostate cancer. *Nutrition.* 2005;21:686-690.
- 19 Bertone-Johnson ER CW. Holick MF. Hollis BW. Colditz GA. Willett WC. Hankinson SE. Plasma 25-hydroxyvitamin D and 1.25-dihydroxyvitamin D and risk of breast cancer. *Cancer Epidemiol Biomarkers Prev.* 2005;14:1991-1997.
- 20 Bertone-Johnson ER HS. Bendich A. Johnson SR. Willett WC. Manson JE. Calcium and vitamin D intake and risk of incident premenstrual syndrome. *Arch Intern Med.* 2005;165(11):1246-1252.
- 21 Blake GJ PA. Manson JE. Williams GR. Buring J. Ridker PM. Glynn RJ. Hemoglobin A1c level and future cardiovascular events among women. *Arch Intern Med.* 2004;164:757-761.
- 22 Boekholdt SM KJ. Wareham NJ. Peters RJ. Jukema JW. Luben R. Bingham SA. Day NE. Kastelein JJ. Khaw KT. Plasma levels of cholesteryl ester transfer protein and the risk of future coronary artery disease in apparently healthy men and women: the prospective EPIC (European Prospective Investigation into Cancer and nutrition)-Norfolk population study. *Circulation.* 2004;110:1418-1423.
- 23 Boekholdt SM PR. Day NE. Luben R. Bingham SA. Wareham NJ. Hack CE. Reitsma PH. Khaw KT. Macrophage migration inhibitory factor and the risk of myocardial infarction or death due to coronary artery disease in adults without prior myocardial infarction or stroke: the EPIC-Norfolk Prospective Population study. *Am J Med.* 2004;117:390-397.
- 24 Boekholdt SM PR. Hack CE. Day NE. Luben R. Bingham SA. Wareham NJ. Reitsma PH. Khaw KT. IL-8 plasma concentrations and the risk of future coronary artery disease in apparently healthy men and women: the EPIC-Norfolk prospective population study. *Arterioscler Thromb Vasc Biol.* 2004;24:1503-1508.
- 25 Borugian MJ SS. Kim-Sing C. Van Patten C. Potter JD. Dunn B. Gallagher RP. Hislop TG. Insulin, macronutrient intake, and physical activity: are potential indicators of insulin resistance associated with mortality from breast cancer? *Cancer Epidemiol Biomarkers Prev.* 2004;13:1163-1172.
- 26 Bower M GB. Mandalia S. Newsom-Davis T. Thirlwell C. Dhillon T. Young AM. Powles T. Gaya A. Nelson M. Stebbing J. A prognostic index for systemic AIDS-related non-Hodgkin lymphoma treated in the era of highly active antiretroviral therapy. *Ann Intern Med.* 2005;143:265-273.

- 27 Boyapati SM SX. Ruan ZX. Dai Q. Cai Q. Gao YT. Zheng W. Soyfood intake and breast cancer survival: a followup of the Shanghai Breast Cancer Study. *Breast Cancer Res Treat.* . 2005;92:11-17.
- 28 Bruno G CF. Merletti F. Cavallo-Perin P. Gandolfo E. Rivetti M. Runzo C. Pinach S. Pagano G; Piedmont Study Group for Diabetes Epidemiology. Residual beta-cell function and male/female ratio are higher in incident young adults than in children: the registry of type 1 diabetes of the province of Turin. Italy. 1984-2000. *Diabetes Care.* 2005;28:312-317.
- 29 Butler LM. Koh WP. Lee HP. Tseng M. Yu MC. London SJ. Prospective Study of Dietary Patterns and Persistent Cough with Phlegm among Chinese Singaporeans. *Am J Respir Crit Care Med.* Feb 1 2006;173:264-270.
- 30 Butler LM KW. Lee HP. Yu MC. London SJ. Dietary fiber and reduced cough with phlegm: a cohort study in Singapore. *Am J Respir Crit Care Med.* 2004;170:279-287.
- 31 Ceschi M SC. Van Den Berg D. Koh WP. Yu MC. Probst-Hensch N. The effect of cyclin D1 (CCND1) G870A-polymorphism on breast cancer risk is modified by oxidative stress among Chinese women in Singapore. *Carcinogenesis.* . 2005;26:1457-1464.
- 32 Chao A TM. Connell CJ. McCullough ML. Jacobs EJ. Flanders WD. Rodriguez C. Sinha R. Calle EE. Meat consumption and risk of colorectal cancer. *JAMA.* 2005;293:172-182.
- 33 Chen C LS. Voigt L. Fitzpatrick A. Plymate SR. Weiss NS. Prostate carcinoma incidence in relation to prediagnostic circulating levels of insulin-like growth factor I. insulin-like growth factor binding protein 3. and insulin. *Cancer.* 2005;103:76-84.
- 34 Chen H ZS. Schwarzschild MA. Hernan MA. Logroscino G. Willett WC. Ascherio A. Folate intake and risk of Parkinson's disease. *Am J Epidemiol.* 2004;160:368-375.
- 35 Chen H ZS. Schwarzschild MA. Hernan MA. Willett WC. Ascherio A. Obesity and the risk of Parkinson's disease. *Am J Epidemiol.* 2004;159:547-555.
- 36 Cherubini A MA. Andres-Lacueva C. Di Iorio A. Lamponi M. Mecocci P. Bartali B. Corsi A. Senin U. Ferrucci L. Vitamin E levels. cognitive impairment and dementia in older persons: the InCHIANTI study. *Neurobiol Aging.* 2005;26:987-994.
- 37 Chiu CJ MM. Rogers G. Jacques PF. Chylack LT Jr. Tung W. Hankinson SE. Willett WC. Taylor A. Carbohydrate intake and glycemic index in relation to the odds of early cortical and nuclear lens opacities. *Am J Clin Nutr.* 2005;81:1411-1416.
- 38 Cho E S-WS. Spiegelman D. Beeson WL. van den Brandt PA. Colditz GA. Folsom AR. Fraser GE. Freudenheim JL. Giovannucci E. Goldbohm RA. Graham S. Miller AB. Pietinen P. Potter JD. Rohan TE. Terry P. Toniolo P. Virtanen MJ. Willett WC. Wolk A. Wu K. Yaun SS. Zeleniuch-Jacquotte A. Hunter DJ. Dairy foods. calcium. and colorectal cancer: a pooled analysis of 10 cohort studies. *J Natl Cancer Inst.* 2004;96:1015-1022.
- 39 Church TS CY. Earnest CP. Barlow CE. Gibbons LW. Priest EL. Blair SN. Exercise capacity and body composition as predictors of mortality among men with diabetes. *Diabetes Care.* 2004;27:83-88.

- 40 Cicuttini FM JG. Forbes A. Wluka AE. Rate of cartilage loss at two years predicts subsequent total knee arthroplasty: a prospective study. *Ann Rheum Dis.* . 2004;63:1124-1127.
- 41 Cocco P FD. Billai B. D'Atri M. Melis M. Blair A. Cancer mortality among men occupationally exposed to dichlorodiphenyltrichloroethane. *Cancer Res.* 2005;65:9588-9594.
- 42 Cohen S DW. Turner RB. Alper CM. Skoner DP. Childhood socioeconomic status and host resistance to infectious illness in adulthood. *Psychosom Med.* . 2004;66:553-558.
- 43 Dallaire F DE. Muckle G. Vezina C. Jacobson SW. Jacobson JL. Ayotte P. Acute infections and environmental exposure to organochlorines in Inuit infants from Nunavik. *Environ Health Perspect.* 2004;112:1359-1365.
- 44 De Bacquer D PE. Clays E. Mak R. Moreau M. de Smet P. Kornitzer M. De Backer G. Perceived job stress and incidence of coronary events: 3-year follow-up of the Belgian Job Stress Project cohort. *Am J Epidemiol.* 2005;161:434-441.
- 45 De Cosmo S MA. Ludovico O. Mastroianno S. Di Giorgio A. Pirro L. Trischitta V. Increased urinary albumin excretion, insulin resistance, and related cardiovascular risk factors in patients with type 2 diabetes: evidence of a sex-specific association. *Diabetes Care.* 2005;28:910-915.
- 46 De Michele M IA. Panico S. Celentano E. Sacchetti L. Mazzaccara C. Salvato A. Bond MG. Salvatore F. Rubba P. Effect of high-density lipoprotein cholesterol levels on carotid artery geometry in a Mediterranean female population. *Eur J Cardiovasc Prev Rehabil.* 2004;11:403-407.
- 47 De Sutter J. De Bacquer D. Cuypers S. et al. Plasma N-terminal pro-brain natriuretic peptide concentration predicts coronary events in men at work: a report from the BELSTRESS study. *Eur Heart J.* Dec 2005;26(24):2644-2649.
- 48 Dijk JM vdGY. Grobbee DE. Bots ML; SMART Study Group. Carotid stiffness indicates risk of ischemic stroke and TIA in patients with internal carotid artery stenosis: the SMART study. *Stroke.* 2004;35:2258-2262.
- 49 Djousse L RP. Hopkins PN. Whitsel EA. Arnett DK. Eckfeldt JH. Province MA. Ellison RC; Investigators of the NHLBI Family Heart Study. Dietary linolenic acid and adjusted QT and JT intervals in the National Heart, Lung, and Blood Institute Family Heart study. *J Am Coll Cardiol.* 2005;45:1716-1722.
- 50 Duncan BB SM. Pankow JS. Bang H. Couper D. Ballantyne CM. Hoogeveen RC. Heiss G. Adiponectin and the development of type 2 diabetes: the atherosclerosis risk in communities study. *Diabetes.* 2004;53:2473-2478.
- 51 Durairaj L TJ. Chrischilles EA. Vaughan Sarrazin MS. Yankey J. Rosenthal GE. Hospital volume-outcome relationships among medical admissions to ICUs. *Chest.* 2005;128:1682-1689.
- 52 Eisner MD KJ. Hammond SK. Koren G. Lactao G. Iribarren C. Directly measured second hand smoke exposure and asthma health outcomes. *Thorax.* 2005;60:814-821.
- 53 Elkind MS SR. Boden-Albala B. Rundek T. Paik MC. Sacco RL. Relative elevation in baseline leukocyte count predicts first cerebral infarction. *Neurology.* 2005;64:2121-2125.
- 54 Elkins JS OME. Longstreth WT Jr. Carlson MC. Manolio TA. Johnston SC. Stroke risk factors and loss of high cognitive function. *Neurology.* 2004;63:793-799.

- 55 Empana JP DP. Charles MA. Jouven X. Sagittal abdominal diameter and risk of sudden death in asymptomatic middle-aged men: the Paris Prospective Study I. *Circulation*. . 2004;110:2781-2785.
- 56 English DR MR. Hodge AM. Hopper JL. Haydon AM. Giles GG. Red meat, chicken, and fish consumption and risk of colorectal cancer. *Cancer Epidemiol Biomarkers Prev*. 2004;13:1509-1514.
- 57 Engstrom G BG. Lindblad B. Janzon L. Lindgarde F. Incidence of fatal or repaired abdominal aortic aneurysm in relation to inflammation-sensitive plasma proteins. *Arterioscler Thromb Vasc Biol*. 2004;24:337-341.
- 58 Engstrom G HB. Eriksson KF. Janzon L. Lindgarde F. Complement C3 is a risk factor for the development of diabetes: a population-based cohort study. *Diabetes*. 2005;54:570-575.
- 59 Engstrom G S-FD. Lindblad B. Janzon L. Lindgarde F. Risk of treatment of peripheral arterial disease is related to inflammation-sensitive plasma proteins: a prospective cohort study. *J Vasc Surg*. 2004;40:1101-1105.
- 60 Erkkila AT BS. Hu FB. Jacques PF. Manson JE. Rexrode KM. Stampfer MJ. Lichtenstein AH. Phylloquinone intake as a marker for coronary heart disease risk but not stroke in women. *Eur J Clin Nutr*. 2005;59(2):196-204.
- 61 Erlinger TP PE. Rifai N. Helzlsouer KJ. C-reactive protein and the risk of incident colorectal cancer. *JAMA*. 2004;291:589-590.
- 62 Esmailzadeh A MP. Azizi F. Whole-grain consumption and the metabolic syndrome: a favorable association in Tehranian adults. *Eur J Clin Nutr*. 2005;59:353-362.
- 63 Flood A PU. Chatterjee N. Lacey JV Jr. Schairer C. Schatzkin A. Calcium from diet and supplements is associated with reduced risk of colorectal cancer in a prospective cohort of women. *Cancer Epidemiol Biomarkers Prev*. 2005;14:126-132.
- 64 Folsom AR DZ. Fish intake, marine omega-3 fatty acids, and mortality in a cohort of postmenopausal women. *Am J Epidemiol*. 2004;160:1005-1010.
- 65 Ford ES MA. Liu S. Healthy Eating Index and C-reactive protein concentration: findings from the National Health and Nutrition Examination Survey III, 1988-1994. *Eur J Clin Nutr*. 2005;59:278-283.
- 66 Forman JP B-FH. Willett WC. Stampfer MJ. Curhan GC. Vitamin D intake and risk of incident hypertension: results from three large prospective cohort studies. *Hypertension*. 2005;46:676-682.
- 67 Fried LF. Katz R. Sarnak MJ. et al. Kidney function as a predictor of noncardiovascular mortality. *J Am Soc Nephrol*. 2005;16:3728-3735.
- 68 Frost L VP. Alcohol and risk of atrial fibrillation or flutter: a cohort study. *Arch Intern Med*. 2004;164:1993-1998.
- 69 Frost L VP. Caffeine and risk of atrial fibrillation or flutter: the Danish Diet, Cancer, and Health Study. *Am J Clin Nutr*. 2005;81:578-582.
- 70 Frost L VP. n-3 Fatty acids consumed from fish and risk of atrial fibrillation or flutter: the Danish Diet, Cancer, and Health Study. *Am J Clin Nutr*. 2005;81:50-54.
- 71 Fujiwara Y CP. Takahashi R. Amano H. Yoshida H. Kumagai S. Fujita K. Wang DG. Shinkai S. Arterial pulse wave velocity as a marker of poor cognitive function in an elderly community-dwelling population. *J Gerontol A Biol Sci Med Sci*. . 2005;60:607-612.

- 72 Fung TT HF. Holmes MD. Rosner BA. Hunter DJ. Colditz GA. Willett WC. Dietary patterns and the risk of postmenopausal breast cancer. *Int J Cancer*. 2005;116:116-121.
- 73 Fung TT SM. Manson JE. Willett WC. Hu FB. Dietary patterns. meat intake. and the risk of type 2 diabetes in women. *Arch Intern Med*. 2004;164:2235-2240.
- 74 Fung TT SM. Manson JE. Rexrode KM. Willett WC. Hu FB. Prospective study of major dietary patterns and stroke risk in women. *Stroke*. 2004;35:2014-2019.
- 75 Gaede P HP. Hess G. Parving HH. Pedersen O. Plasma N-terminal pro-brain natriuretic peptide as a major risk marker for cardiovascular disease in patients with type 2 diabetes and microalbuminuria. *Diabetologia*. 2005;48(1):156-163.
- 76 Gago-Dominguez M CJ. Sun CL. Van Den Berg D. Koh WP. Lee HP. Yu MC. Marine n-3 fatty acid intake. glutathione S-transferase polymorphisms and breast cancer risk in post-menopausal Chinese women in Singapore. *Carcinogenesis*. 2004;25:2143-2147.
- 77 Garcia-Palmieri MR CC. Mc Gee D. Sempos C. Smit E. Sorlie PD. Wide pulse pressure is an independent predictor of cardiovascular mortality in Puerto Rican men. *Nutr Metab Cardiovasc Dis*. 2005;15(1):71-78.
- 78 Manson JE. Buring JE. Levey AS. Gaziano JM. Association between body mass index and CKD in apparently healthy men. *Am J Kidney Di*. 2005;46:871-80
- 79 George DJ HS. Shepard TF. Sanford B. Vogelzang NJ. Small EJ. Kantoff PW. The prognostic significance of plasma interleukin-6 levels in patients with metastatic hormone-refractory prostate cancer: results from cancer and leukemia group B 9480. *Clin Cancer Res*. . 2005;11:1815-1820.
- 80 Gilbert PB PM. Follmann D. Hudgens MG. Francis DP. Gurwith M. Heyward WL. Jobes DV. Popovic V. Self SG. Sinangil F. Burke D. Berman PW. Correlation between immunologic responses to a recombinant glycoprotein 120 vaccine and incidence of HIV-1 infection in a phase 3 HIV-1 preventive vaccine trial. *J Infect Dis*. 2005;191:666-677.
- 81 Giles LC GG. Luszcz MA. Andrews GR. Effect of social networks on 10 year survival in very old Australians: the Australian longitudinal study of aging. *J Epidemiol Community Health*. . 2005;59:574-579.
- 82 Giltay EJ GJ. Zitman FG. Hoekstra T. Schouten EG. Dispositional optimism and all-cause and cardiovascular mortality in a prospective cohort of elderly dutch men and women. *Arch Gen Psychiatry*. 2004;61:1126-1135.
- 83 Goderie-Plomp HW vdKM. de Ronde W. Hofman A. de Jong FH. Pols HA. Endogenous sex hormones. sex hormone-binding globulin. and the risk of incident vertebral fractures in elderly men and women: the Rotterdam Study. *J Clin Endocrinol Metab*. 2004;89:3261-3269.
- 84 Golden SH. Williams JE. Ford DE. et al. Anger temperament is modestly associated with the risk of type 2 diabetes mellitus: The atherosclerosis risk in communities study. *Psychoneuroendocrinology*. 2005.
- 85 Golden SH WJ. Ford DE. Yeh HC. Paton Sanford C. Nieto FJ. Brancati FL; Atherosclerosis Risk in Communities study. Depressive symptoms and the risk of type 2 diabetes: the Atherosclerosis Risk in Communities study. *Diabetes Care*. 2004;27:429-435.

- 86 Greisenegger S EG. Hsieh K. Tentschert S. Mannhalter C. Lalouschek W. Is elevated mean platelet volume associated with a worse outcome in patients with acute ischemic cerebrovascular events? *Stroke*. 2004;35:1688-1691.
- 87 Guerra S LI. Halonen M. Martinez FD. Wright AL. Reduced interferon gamma production and soluble CD14 levels in early life predict recurrent wheezing by 1 year of age. *Am J Respir Crit Care Med*. 2004;169:70-76.
- 88 Gunnarsdottir I BB. Benediktsson R. Gudnason V. Thorsdottir I. Association between size at birth, truncal fat and obesity in adult life and its contribution to blood pressure and coronary heart disease; study in a high birth weight population. *Eur J Clin Nutr*. 2004;58:812-818.
- 89 Hadjadj S D-BB. Bekherras A. BrIdoux F. Gallois Y. Mauco G. Ebran J. Marre M. Serum triglycerides are a predictive factor for the development and the progression of renal and retinal complications in patients with type 1 diabetes. *Diabetes Metab*. . 2004;30:43-51.
- 90 Haim M BV. Goldbourt U. Battler A. Behar S. Predictive value of elevated white blood cell count in patients with preexisting coronary heart disease: the Bezafibrate Infarction Prevention Study. *Arch Intern Med*. 2004;164:433-439.
- 91 Hannan LM LM. Lacey JV Jr. Colbert LH. Albanes D. Schatzkin A. Schairer C. Physical activity and risk of ovarian cancer: a prospective cohort study in the United States. *Cancer Epidemiol Biomarkers Prev*. 2004;13:765-770.
- 92 Hartman TJ AP. Snyder K. Slaterry ML. Caan B. Paskett E. Iber F. Kikendall JW. Marshall J. Shike M. Weissfeld J. Brewer B. Schatzkin A. Lanza E; Polyp Prevention Study Group. The association of calcium and vitamin D with risk of colorectal adenomas. *J Nutr*. 2005;135:252-259.
- 93 Harville EW HM. Zhang J. Perceived life stress and bacterial vaginosis. *J Womens Health (Larchmt)*. . 2005;14:627-633.
- 94 Haumer M AJ. Exner M. Mlekusch W. Sabeti S. Schlager O. Schwarzingler I. Wagner O. Minar E. Schillinger M. Association of neutrophils and future cardiovascular events in patients with peripheral artery disease. *J Vasc Surg*. 2005;41:610-617.
- 95 Hayashi T BE. Leonetti DL. McNeely MJ. Newell-Morris L. Kahn SE. Fujimoto WY. Visceral adiposity is an independent predictor of incident hypertension in Japanese Americans. *Ann Intern Med*. 2004;140:992-1000.
- 96 He K MA. Rimm EB. Rosner BA. Stampfer MJ. Willett WC. Ascherio A. Folate, vitamin B6, and B12 intakes in relation to risk of stroke among men. *Stroke*. 2004;35:169-174.
- 97 Hedblad B OM. Engstrom G. Wollmer P. Janzon L. Heterogeneity of cardiovascular risk among smokers is related to degree of carbon monoxide exposure. *Atherosclerosis*. 2005;179:177-183.
- 98 Heidemann C HK. Spranger J. Klipstein-Grobusch K. Mohlig M. Pfeiffer AF. Boeing H; European Prospective Investigation into Cancer and Nutrition (EPIC)--Potsdam Study Cohort. A dietary pattern protective against type 2 diabetes in the European Prospective Investigation into Cancer and Nutrition (EPIC)--Potsdam Study cohort. *Diabetologia*. 2005;48:1126-1134.
- 99 Higginbotham S ZZ. Lee IM. Cook NR. Giovannucci E. Buring JE. Liu S; Women's Health Study. Dietary glycemic load and risk of colorectal cancer in the Women's Health Study. *J Natl Cancer Inst*. 2004;96:229-233.
- 100 Higginbotham S ZZ. Lee IM. Cook NR. Buring JE. Liu S. Dietary glycemic load and breast cancer risk in the Women's Health Study. *Cancer Epidemiol Biomarkers Prev*. 2004;13:65-70.

- 101 Hill DJ HC. Food allergy and atopic dermatitis in infancy: an epidemiologic study. *Pediatr Allergy Immunol.* 2004;15:421-427.
- 102 Hirvonen T TM. Pietinen P. Korhonen P. Albanes D. Virtamo J. Flavonol and flavone intake and the risk of intermittent claudication in male smokers. *Eur J Epidemiol.* 2004;19:305-311.
- 103 Hoffmeister A RD. Kunze M. Brenner H. Koenig W. Prognostic value of inflammatory markers alone and in combination with blood lipids in patients with stable coronary artery disease. *Eur J Intern Med.* 2005;16:47-52.
- 104 Holmes MD LS. Hankinson SE. Colditz GA. Hunter DJ. Willett WC. Dietary carbohydrates, fiber, and breast cancer risk. *Am J Epidemiol.* 2004;159:732-9.
- 105 Horne BD MJ. Lappe DL. Renlund DG. Bair TL. Bunch TJ. Anderson JL; Intermountain Heart Collaborative Study Group. Less affluent area of residence and lesser-insured status predict an increased risk of death or myocardial infarction after angiographic diagnosis of coronary disease. *Ann Epidemiol.* 2004;14:143-150.
- 106 Houston DK SJ. Cai J. Haines PS. Dairy, fruit, and vegetable intakes and functional limitations and disability in a biracial cohort: the Atherosclerosis Risk in Communities Study. *Am J Clin Nutr.* . 2005;81:1454.
- 107 Hu FB MJ. Li TY. Rifai N. Manson JE. Inflammatory markers and risk of developing type 2 diabetes in women. *Diabetes.* 2004;53:693-700.
- 108 Hubbard JS RS. Landis PK. Metter EJ. Muller DC. Andres R. Carter HB. Platz EA. Association of prostate cancer risk with insulin, glucose, and anthropometry in the Baltimore longitudinal study of aging. *Urology.* 2004;63:253-258.
- 109 Hung HC JK. Jiang R. Hu FB. Hunter D. Smith-Warner SA. Colditz GA. Rosner B. Spiegelman D. Willett WC. Fruit and vegetable intake and risk of major chronic disease. *J Natl Cancer Inst.* 2004;96:1577-1584.
- 110 Hutchings A RR. Brady A. Wildman M. Rowan K. Socioeconomic status and outcome from intensive care in England and Wales. *Med Care.* 2004;42:943-951.
- 111 Ito Y WK. Suzuki K. Ozasa K. Watanabe Y. Seki N. Ando M. Nishino Y. Kondo T. Ohno Y. Tamakoshi A; JACC Study Group. Lung cancer mortality and serum levels of carotenoids, retinol, tocopherols, and folic acid in men and women: a case-control study nested in the JACC Study. *J Epidemiol.* 2005;15:S140-149.
- 112 Jansen MC B-d-MH. Feskens EJ. Streppel MT. Kok FJ. Kromhout D. Quantity and variety of fruit and vegetable consumption and cancer risk. *Nutr Cancer.* . 2004;48:142-148.
- 113 Jee SH. Park JY. Kim HS. Lee TY. Samet JM. White blood cell count and risk for all-cause, cardiovascular, and cancer mortality in a cohort of Koreans. *Am J Epidemiol.* Dec 1 2005;162:1062-1069.
- 114 Jensen MK K-BP. Hu FB. Franz M. Sampson L. Gronbaek M. Rimm EB. Intakes of whole grains, bran, and germ and the risk of coronary heart disease in men. *Am J Clin Nutr.* 2004;80:1492-1499.
- 115 Jiang R MJ. Meigs JB. Ma J. Rifai N. Hu FB. Body iron stores in relation to risk of type 2 diabetes in apparently healthy women. *JAMA.* 2004;291:711-717.
- 116 Jiang R MJ. Ascherio A. Stampfer MJ. Willett WC. Hu FB. Dietary iron intake and blood donations in relation to risk of type 2 diabetes in men: a prospective cohort study. *Am J Clin Nutr.* 2004;79:70-75.



- 117 Jiang R SM. Li T. Rifai N. Stampfer MJ. Rimm EB. Hu FB. Non-HDL cholesterol and apolipoprotein B predict cardiovascular disease events among men with type 2 diabetes. *Diabetes Care*. 2004;27:1991-1997.
- 118 Johansson L JJ. Stegmayr B. Nilsson TK. Hallmans G. Boman K. Hemostatic factors as risk markers for intracerebral hemorrhage: a prospective incident case-referent study. *Stroke*. 2004;35:826-830.
- 119 Jowett SL SC. Pearce MS. Phillips E. Gregory W. Barton JR. Welfare MR. Influence of dietary factors on the clinical course of ulcerative colitis: a prospective cohort study. *GUT*. 2004;53:1479-1484.
- 120 Kaaks R BF. Key T. Rinaldi S. Dossus L. Biessy C. Secreto G. Amiano P. Bingham S. Boeing H. Bueno de Mesquita HB. Chang-Claude J. Clavel-Chapelon F. Fournier A. van Gils CH. Gonzalez CA. Gurrea AB. Critselis E. Khaw KT. Krogh V. Lahmann PH. Nagel G. Olsen A. Onland-Moret NC. Overvad K. Palli D. Panico S. Peeters P. Quiros JR. Roddam A. Thiebaut A. Tjonneland A. Chirlaque MD. Trichopoulou A. Trichopoulos D. Tumino R. Vineis P. Norat T. Ferrari P. Slimani N. Riboli E. Serum sex steroids in premenopausal women and breast cancer risk within the European Prospective Investigation into Cancer and Nutrition (EPIC). *J Natl Cancer Inst*. 2005;97:755-765.
- 121 Kado DM KA. Huang MH. Troen A. Rowe JW. Selhub J. Seeman TE. Homocysteine versus the vitamins folate, B6, and B12 as predictors of cognitive function and decline in older high-functioning adults: MacArthur Studies of Successful Aging. *Am J Med*. 2005;118:161-167.
- 122 Kahn RS BD. Whitaker RC. Combined effect of mothers' and fathers' mental health symptoms on children's behavioral and emotional well-being. *Arch Pediatr Adolesc Med* 2004;158(8):721-729.
- 123 Kang JH PL. Willett WC. Rosner BA. Egan KM. Faberowski N. Hankinson SE. Dietary fat consumption and primary open-angle glaucoma. *Am J Clin Nutr*. 2004;79:755-764.
- 124 Kant AK GB. Schatzkin A. Dietary patterns predict mortality in a national cohort: the National Health Interview Surveys, 1987 and 1992. *J Nutr*. 2004;134:1793-1799.
- 125 Kawamoto R TH. Oka Y. Kodama A. Ohtsuka N. Kamitani A. Association between uric acid and carotid atherosclerosis in elderly persons. *Intern Med*. 2005;44:787-793.
- 126 Keinan-Boker L vDSY. Grobbee DE. Peeters PH. Am J Clin Nutr. . *Dietary phytoestrogens and breast cancer risk*. 2004;79:282-288.
- 127 Khan MM HM. Kobayashi K. Sakauchi F. Yamashita T. Ahmed MF. Hossain MD. Quamruzzaman Q. Mori M. Levels of blood and urine chemicals associated with longer duration of having arsenicosis in Bangladesh. *Int J Environ Health Res*. 2005;15:289-301.
- 128 Khaw KT BS. Welch A. Luben R. O'Brien E. Wareham N. Day N. Blood pressure and urinary sodium in men and women: the Norfolk Cohort of the European Prospective Investigation into Cancer (EPIC-Norfolk). *Am J Clin Nutr*. 2004;80:1397-1403.
- 129 Kiechl S SG. Wenning G. Redlich K. Oberhollenzer M. Mayr A. Santer P. Smolen J. Poewe W. Willeit J. Osteoprotegerin is a risk factor for progressive atherosclerosis and cardiovascular disease. *Circulation*. 2004;109:2175-2180.

- 130 Kilkkinen A VJ. Vartiainen E. Sankila R. Virtanen MJ. Adlercreutz H. Pietinen P. Serum enterolactone concentration is not associated with breast cancer risk in a nested case-control study. *Int J Cancer*. 2004;108:277-280.
- 131 Kim MK SS. Sasazuki S. Tsugane S; Japan Public Health Center-based Prospective Study Group. Prospective study of three major dietary patterns and risk of gastric cancer in Japan. *Int J Cancer*. 2004;110:435-442.
- 132 Kim MK SS. Otani T. Tsugane S; Japan Public Health Center-based Prospective Study Group. Dietary patterns and subsequent colorectal cancer risk by subsite: a prospective cohort study. *Int J Cancer*. 2005;115(5):790-798
- 133 Kitamura A IH. Imano H. Ohira T. Okada T. Sato S. Kiyama M. Tanigawa T. Yamagishi K. Shimamoto T. Carotid intima-media thickness and plaque characteristics as a risk factor for stroke in Japanese elderly men. *Stroke*. 2004;35:2788-2794.
- 134 Klein R KB. Tomany SC. Wong TY. The relation of retinal microvascular characteristics to age-related eye disease: the Beaver Dam eye study. *Am J Ophthalmol*. 2004;137:435-444.
- 135 Knekt P RJ. Pereira MA. O'Reilly EJ. Augustsson K. Fraser GE. Goldbourt U. Heitmann BL. Hallmans G. Liu S. Pietinen P. Spiegelman D. Stevens J. Virtamo J. Willett WC. Rimm EB. Ascherio A. Antioxidant vitamins and coronary heart disease risk: a pooled analysis of 9 cohorts. *Am J Clin Nutr*. 2004;80:1508-1520.
- 136 Kobayashi M TY. Otani T. Hanaoka T. Sobue T. Tsugane S; JPHC Study Group. Fish. long-chain n-3 polyunsaturated fatty acids. and risk of colorectal cancer in middle-aged Japanese: the JPHC study. *Nutr Cancer*. 2004;49:32-40.
- 137 Koenig W TD. Brenner H. Rothenbacher D. Plasma concentrations of cystatin C in patients with coronary heart disease and risk for secondary cardiovascular events: more than simply a marker of glomerular filtration rate. *Clin Chem*. 2005;51:321-327.
- 138 Kojima M WK. Tokudome S. Suzuki K. Tamakoshi K. Watanabe Y. Kawado M. Hashimoto S. Hayakawa N. Ozasa K. Toyoshima H. Suzuki S. Ito Y. Tamakoshi A; JACC Study Group. Serum levels of polyunsaturated fatty acids and risk of colorectal cancer: a prospective study. *Am J Epidemiol*. 2005;161(5):462-471.
- 139 Koren-Morag N TD. Goldbourt U. White blood cell count and the incidence of ischemic stroke in coronary heart disease patients. *Am J Med*. 2005;118:1004-1009.
- 140 Koushik A HD. Spiegelman D. Anderson KE. Arslan AA. Beeson WL. van den Brandt PA. Buring JE. Cerhan JR. Colditz GA. Fraser GE. Freudenheim JL. Genkinger JM. Goldbohm RA. Hankinson SE. Koenig KL. Larsson SC. Leitzmann M. McCullough ML. Miller AB. Patel A. Rohan TE. Schatzkin A. Smit E. Willett WC. Wolk A. Zhang SM. Smith-Warner SA. Fruits and vegetables and ovarian cancer risk in a pooled analysis of 12 cohort studies. *Cancer Epidemiol Biomarkers Prev*. 2005;14:2160-2167.
- 141 Kragelund C GB. Kober L. Hildebrandt P. Steffensen R. N-terminal pro-B-type natriuretic peptide and long-term mortality in stable coronary heart disease. *N Engl J Med*. 2005;352:666-675.
- 142 Krause N RR. Ragland DR. Syme SL. Physical workload. ergonomic problems. and incidence of low back injury: a 7.5-year prospective study of San Francisco transit operators. *Am J Ind Med*. 2004;46:570-585.

- 143 Kurl S LJ. Niskanen L. Rauramaa R. Tuomainen TP. Sivenius J. Salonen JT. Cardiac power during exercise and the risk of stroke in men. *Stroke*. 2005;36:820-824.
- 144 Kurth T HC. Sturmer T. Sesso HD. Glynn RJ. Buring JE. Gaziano JM. Analgesic use and risk of subsequent hypertension in apparently healthy men. *Arch Intern Med*. 2005;165:1903-1909.
- 145 Kurzius-Spencer M HM. Carla Lohman I. Martinez FD. Wright AL. Prenatal factors associated with the development of eczema in the first year of life. *Pediatr Allergy Immunol*. 2005;16:19-26.
- 146 Larsson SC BL. Wolk A. Magnesium intake in relation to risk of colorectal cancer in women. *JAMA*. 2005;293:86-89.
- 147 Larsson SC BL. Wolk A. High-fat dairy food and conjugated linoleic acid intakes in relation to colorectal cancer incidence in the Swedish Mammography Cohort. *Am J Clin Nutr*. 2005;82:894-900.
- 148 Larsson SC GE. Wolk A. Dietary folate intake and incidence of ovarian cancer: the Swedish Mammography Cohort. *J Natl Cancer Inst*. 2004;96:396-402.
- 149 Larsson SC GE. Wolk A. Vitamin B6 intake, alcohol consumption, and colorectal cancer: a longitudinal population-based cohort of women. *Gastroenterology*. 2005;128:1830-1837.
- 150 Larsson SC GE. Wolk A. A prospective study of dietary folate intake and risk of colorectal cancer: modification by caffeine intake and cigarette smoking. *Cancer Epidemiol Biomarkers Prev*. 2005;14:740-743.
- 151 Leitzmann MF SM. Michaud DS. Augustsson K. Colditz GC. Willett WC. Giovannucci EL. Dietary intake of n-3 and n-6 fatty acids and the risk of prostate cancer. *Am J Clin Nutr*. 2004;80:204-216.
- 152 Leosdottir M NP. Nilsson JA. Mansson H. Berglund G. Dietary fat intake and early mortality patterns—data from The Malmo Diet and Cancer Study. *J Intern Med*. 2005;258:153-165.
- 153 Leung H WJ. Rochtchina E. Wong TY. Klein R. Mitchell P. Impact of current and past blood pressure on retinal arteriolar diameter in an older population. *J Hypertens*. 2004;22:1543-1549.
- 154 Li G SJ. Kukull WA. Peskind ER. Tsuang DW. Breitner JC. McCormick W. Bowen JD. Teri L. Schellenberg GD. Larson EB. Serum cholesterol and risk of Alzheimer disease: a community-based cohort study. *Neurology*. 2005;65:1045-1050.
- 155 Lim S LH. Kimm KC. Park C. Shin C. Cho NH. C-reactive protein level as an independent risk factor of metabolic syndrome in the Korean population CRP as risk factor of metabolic syndrome. *Diabetes Res Clin Pract*. 2005;70:126-133.
- 156 Lin J ZS. Cook NR. Lee IM. Buring JE. Dietary fat and fatty acids and risk of colorectal cancer in women. *Am J Epidemiol*. 2004;160(10):1011-1022.
- 157 Lin J ZS. Cook NR. Rexrode KM. Liu S. Manson JE. Lee IM. Buring JE. Dietary intakes of fruit, vegetables, and fiber, and risk of colorectal cancer in a prospective cohort of women (United States). *Cancer Causes Control*. 2005;16:225-233.
- 158 Lin J ZS. Cook NR. Manson JE. Lee IM. Buring JE. Intakes of calcium and vitamin D and risk of colorectal cancer in women. *Am J Epidemiol*. 2005;161:755-764.

- 159 Lin Y TA. Kikuchi S. Yagyu K. Obata Y. Ishibashi T. Kawamura T. Inaba Y. Kurosawa M. Motohashi Y. Ohno Y. Serum insulin-like growth factor-I, insulin-like growth factor binding protein-3, and the risk of pancreatic cancer death. *Int J Cancer*. 2004;110:584-588.
- 160 Loucks EB BL. Gruenewald TL. Seeman TE. Social integration is associated with fibrinogen concentration in elderly men. *Psychosom Med*. 2005;67:353-358.
- 161 Louis GM WJ. Whitcomb BW. Sperrazza R. Schisterman EF. Lobbell DT. Crickard K. Greizerstein H. Kostyniak PJ. Environmental PCB exposure and risk of endometriosis. *Hum Reprod*. 2004;20:279-285.
- 162 Lu M CE. Taylor A. Hankinson SE. Willett WC. Jacques PF. Prospective study of dietary fat and risk of cataract extraction among US women. *Am J Epidemiol*. 2005;161:948-959.
- 163 Lu M TA. Chylack LT Jr. Rogers G. Hankinson SE. Willett WC. Jacques PF. Dietary fat intake and early age-related lens opacities. *Am J Clin Nutr*. 2005;81(4):773-779.
- 164 Luchsinger JA TM. Shea S. Mayeux R. Hyperinsulinemia and risk of Alzheimer disease. *Neurology*. 2004;63:1187-1192.
- 165 Luchsinger JA TM. Shea S. Miller J. Green R. Mayeux R. Plasma homocysteine levels and risk of Alzheimer disease. *Neurology*. 2004;62:1972-1976.
- 166 Luchtenborg M WM. de Goeij AF. Wark PA. Brink M. Roemen GM. Lentjes MH. de Bruine AP. Goldbohm RA. van 't Veer P. van den Brandt PA. Meat and Fish Consumption, APCGene Mutations and hMLH1 Expression in Colon and Rectal Cancer: a Prospective Cohort Study (The Netherlands). *Cancer Causes Control*. 2005;19:1041-54.
- 167 Lukanova A. Bjor O. Kaaks R. et al. Body mass index and cancer: results from the Northern Sweden Health and Disease Cohort. *Int J Cancer*. Jan 15 2006;118:458-466.
- 168 Lukanova A. Zeleniuch-Jacquotte A. Lundin E. et al. Prediagnostic levels of C-peptide, IGF-I, IGFBP -1, -2 and -3 and risk of endometrial cancer. *Int J Cancer*. Jan 10 2004;108:262-268.
- 169 Lukanova A LE. Micheli A. Arslan A. Ferrari P. Rinaldi S. Krogh V. Lenner P. Shore RE. Biessy C. Muti P. Riboli E. Koenig KL. Levitz M. Stattin P. Berrino F. Hallmans G. Kaaks R. Toniolo P. Zeleniuch-Jacquotte A. Circulating levels of sex steroid hormones and risk of endometrial cancer in postmenopausal women. *Int J Cancer*. 2004;108:425-432.
- 170 Lundblad D DB. Rautio A. Roder ME. Eliasson M. Low level of tissue plasminogen activator activity in non-diabetic patients with a first myocardial infarction. *J Intern Med*. 2005;258:13-20.
- 171 Luo ZC KW. Wilkins R. Liston RM. Mohamed J. Kramer MS; British Columbia Vital Statistics Agency. Disparities in birth outcomes by neighborhood income: temporal trends in rural and urban areas, british columbia. *Epidemiology*. 2004;15:679-686.
- 172 MacInnis RJ ED. Hopper JL. Haydon AM. Gertig DM. Giles GG. Body size and composition and colon cancer risk in men. *Cancer Epidemiol Biomarkers Prev*. 2004;13:553-559.
- 173 Madsen TE MJ. Carlquist JF. Horne BD. Bair TL. Jackson JD. Lappe JM. Pearson RR. Anderson JL. Serum uric acid independently predicts mortality in

- patients with significant, angiographically defined coronary disease. *Am J Nephrol.* 2005;25:45-49.
- 174 Mahabir S LM. Virtanen MJ. Virtamo J. Pietinen P. Albanes D. Taylor PR. Prospective study of alcohol drinking and renal cell cancer risk in a cohort of finnish male smokers. *Cancer Epidemiol Biomarkers Prev.* 2005;14:170-175.
- 175 Mai V KA. Flood A. Lacey JV Jr. Schairer C. Schatzkin A. Diet quality and subsequent cancer incidence and mortality in a prospective cohort of women. *Int J Epidemiol.* 2005;34:54-60.
- 176 Mallamaci F BG. Seminara G. Rapisarda F. Fatuzzo P. Candela V. Scudo P. Spoto B. Testa A. Tripepi G. Tech S. Zoccali C. Hyperhomocysteinemia and arteriovenous fistula thrombosis in hemodialysis patients. *Am J Kidney Dis.* 2005;45:702-707.
- 177 Mangtani P BE. Kovats S. Ng ES. Roberts JA. Fletcher A. Inequalities in influenza vaccine uptake among people aged over 74 years in Britain. *Prev Med.* . 2005;41:545-553.
- 178 Manjer J JR. Lenner P. Smoking is associated with postmenopausal breast cancer in women with high levels of estrogens. *Int J Cancer.* 2004;112:324-328.
- 179 Mannisto S DL. Balder HF. Virtanen MJ. Krogh V. Khani BR. Berrino F. van den Brandt PA. Hartman AM. Pietinen P. Tan F. Wolk A. Goldbohm RA. Dietary patterns and breast cancer risk: results from three cohort studies in the DIETSCAN project. *Cancer Causes Control.* 2005;16:725-733.
- 180 Mannisto S S-WS. Spiegelman D. Albanes D. Anderson K. van den Brandt PA. Cerhan JR. Colditz G. Feskanich D. Freudenheim JL. Giovannucci E. Goldbohm RA. Graham S. Miller AB. Rohan TE. Virtamo J. Willett WC. Hunter DJ. Dietary carotenoids and risk of lung cancer in a pooled analysis of seven cohort studies. *Cancer Epidemiol Biomarkers Prev.* 2004;13(1):40-48.
- 181 Margolis KL MJ. Greenland P. Rodabough RJ. Bray PF. Safford M. Grimm RH Jr. Howard BV. Assaf AR. Prentice R; Women's Health Initiative Research Group. Leukocyte count as a predictor of cardiovascular events and mortality in postmenopausal women: the Women's Health Initiative Observational Study. *Arch Intern Med.* 2005;165:500-508.
- 182 Maru S vdSY. Gimbrete CH. Grobbee DE. Peeters PH. Body mass index and short-term weight change in relation to mortality in Dutch women after age 50 y. *Am J Clin Nutr.* 2004;80:231-236.
- 183 Massy ZA FC. Borderie D. Tuppin P. Nguyen-Khoa T. Benoit MO. Jacquot C. Buisson C. Druke TB. Ekindjian OG. Lacour B. Iliou MC. Increased plasma S-nitrosothiol concentrations predict cardiovascular outcomes among patients with end-stage renal disease: a prospective study. *J Am Soc Nephrol.* 2004;15:470-476.
- 184 Mattisson I WE. Johansson U. Gullberg B. Olsson H. Berglund G. Intakes of plant foods, fibre and fat and risk of breast cancer--a prospective study in the Malmo Diet and Cancer cohort. *Br J Cancer.* 2004;90:122-127.
- 185 Mayne ST. Cartmel B. Lin H. Zheng T. Goodwin WJ. Jr. Low plasma lycopene concentration is associated with increased mortality in a cohort of patients with prior oral, pharynx or larynx cancers. *J Am Coll Nutr.* Feb 2004;23:34-42.
- 186 McKeown NM MJ. Liu S. Saltzman E. Wilson PW. Jacques PF. Carbohydrate nutrition, insulin resistance, and the prevalence of the metabolic syndrome in the Framingham Offspring Cohort. *Diabetes Care.* 2004;27:538-546.

- 187 Mehling WE KN. Are difficulties perceiving and expressing emotions associated with low-back pain? The relationship between lack of emotional awareness (alexithymia) and 12-month prevalence of low-back pain in 1180 urban public transit operators. *J Psychosom Res.* 2005;58:73-81.
- 188 Meier C NT. Center JR. Seibel MJ. Eisman JA. Bone resorption and osteoporotic fractures in elderly men: the dubbo osteoporosis epidemiology study. *J Bone Miner Res.* 2005;20:579-587.
- 189 Merkin SS CJ. Roux AV. Taylor HA. Powe NR. Area socioeconomic status and progressive CKD: the Atherosclerosis Risk in Communities (ARIC) Study. *Am J Kidney Dis.* 2005;46:203-213.
- 190 Merlino LA CJ. Mikuls TR. Cerhan JR. Criswell LA. Saag KG; Iowa Women's Health Study. Vitamin D intake is inversely associated with rheumatoid arthritis: results from the Iowa Women's Health Study. *Arthritis Rheum.* 2004;50:72-77.
- 191 Messer LC. Dole N. Kaufman JS. Savitz DA. Pregnancy Intendedness. Maternal Psychosocial Factors and Preterm Birth. *Matern Child Health J.* 2005;1-10.
- 192 Meyerhardt JA TJ. Niedzwiecki D. Hollis DR. Schrag D. Ayanian JZ. O'Connell MJ. Weeks JC. Mayer RJ. Willett CG. MacDonald JS. Benson AB 3rd. Fuchs CS. Impact of hospital procedure volume on surgical operation and long-term outcomes in high-risk curatively resected rectal cancer: findings from the Intergroup 0114 Study. *J Clin Oncol.* . 2004;22:166-174.
- 193 Michaud DS FC. Liu S. Willett WC. Colditz GA. Giovannucci E. Dietary glycemic load, carbohydrate, sugar, and colorectal cancer risk in men and women. *Cancer Epidemiol Biomarkers Prev.* 2005;14:138-147.
- 194 Michaud DS SH. Wu K. Hu F. Giovannucci E. Willett WC. Colditz GA. Fuchs CS. Dietary patterns and pancreatic cancer risk in men and women. *J Natl Cancer Inst.* 2005;97:518-524.
- 195 Michaud DS WM. Cantor KP. Taylor PR. Virtamo J. Albanes D. Arsenic concentrations in prediagnostic toenails and the risk of bladder cancer in a cohort study of male smokers. *Am J Epidemiol.* 2004;160:853-859.
- 196 Micheli A MP. Secreto G. Krogh V. Meneghini E. Venturelli E. Sieri S. Pala V. Berrino F. Endogenous sex hormones and subsequent breast cancer in premenopausal women. *Int J Cancer.* 2004;112:312-318.
- 197 Mielke MM. Zandi PP. Sjogren M. et al. High total cholesterol levels in late life associated with a reduced risk of dementia. *Neurology.* May 24 2005;64:1689-1695.
- 198 Miller AB AH. Bueno-de-Mesquita B. Boshuizen HC. Agudo A. Berrino F. Gram IT. Janson L. Linseisen J. Overvad K. Rasmuson T. Vineis P. Lukanova A. Allen N. Amiano P. Barricarte A. Berglund G. Boeing H. Clavel-Chapelon F. Day NE. Hallmans G. Lund E. Martinez C. Navarro C. Palli D. Panico S. Peeters PH. Quiros JR. Tjonneland A. Tumino R. Trichopoulou A. Trichopoulos D. Slimani N. Riboli E. Fruits and vegetables and lung cancer: Findings from the European Prospective Investigation into Cancer and Nutrition. *Int J Cancer.* 2004;108:269-272.
- 199 Mishra GD BK. Dobson AJ. Byles JE. Do socioeconomic gradients in women's health widen over time and with age? *Soc Sci Med.* 2004;58:1585-1595.
- 200 Molyneux A LS. Antoniak M. Browne W. McNeill A. Godfrey C. Madeley R. Britton J. Prospective study of the effect of exposure to other smokers in high

- school tutor groups on the risk of incident smoking in adolescence. *Am J Epidemiol.* 2004;159:127-132.
- 201** Mommers M SL. Goldbohm RA. van den Brandt PA. Consumption of vegetables and fruits and risk of ovarian carcinoma. *Cancer.* 2005;104:1512-1519.
- 202** Montonen J. Knekt P. Harkanen T. et al. Dietary patterns and the incidence of type 2 diabetes. *Am J Epidemiol.* Feb 1 2005;161:219-227.
- 203** Montonen J. Knekt P. Jarvinen R. Reunanen A. Dietary antioxidant intake and risk of type 2 diabetes. *Diabetes Care.* Feb 2004;27:362-366.
- 204** Montonen J JR. Heliovaara M. Reunanen A. Aromaa A. Knekt P. Food consumption and the incidence of type II diabetes mellitus. *Eur J Clin Nutr.* 2005;59:441-448.
- 205** Morange PE SC. Alessi MC. Luc G. Arveiler D. Ferrieres J. Amouyel P. Evans A. Ducimetiere P. Juhan-Vague I; PRIME Study Group. Endothelial cell markers and the risk of coronary heart disease: the Prospective Epidemiological Study of Myocardial Infarction (PRIME) study. *Circulation.* 2004;109:1343-1348
- 206** Mozaffarian D BC. Lemaitre RN. Burke GL. Siscovick DS. Fish intake and risk of incident heart failure. *J Am Coll Cardiol.* 2005;45:2015-2021.
- 207** Mucci LA AH. Wolk A. Prospective study of dietary acrylamide and risk of colorectal cancer among women. *Int J Cancer.* 2005;118:169-173.
- 208** Munger KL ZS. O'Reilly E. Hernan MA. Olek MJ. Willett WC. Ascherio A. Vitamin D intake and incidence of multiple sclerosis. *Neurology.* 2004;62:60-65.
- 209** Myint PK. Luben RN. Surtees PG. et al. Relation Between Self-Reported Physical Functional Health and Chronic Disease Mortality in Men And Women in the European Prospective Investigation Into Cancer (EPIC-Norfolk): A Prospective Population Study. *Ann Epidemiol.* 2005.
- 210** Nagata C TN. Shimizu N. Shimizu H. Sodium intake and risk of death from stroke in Japanese men and women. *Stroke.* 2004;35:1543-1547.
- 211** Nagel G LJ. Dietary intake of fatty acids, antioxidants and selected food groups and asthma in adults. *Eur J Clin Nutr.* 2005;59:8-15.
- 212** Nair GV CL. Vittinghoff E. Herrington DM; Heart and Estrogen/Progestin Replacement Study Investigators. Pulse pressure and cardiovascular events in postmenopausal women with coronary heart disease. *Chest.* 2005;127:1498-1506.
- 213** Nakanishi N SK. Arch Intern Med. . *Daily life activity and the risk of developing hypertension in middle-aged Japanese men.* 2005;165(2):214-220.
- 214** Navas-Acien A SE. Sharrett AR. Calderon-Aranda E. Silbergeld E. Guallar E. Lead, cadmium, smoking, and increased risk of peripheral arterial disease. *Circulation.* 2004;109):3196-3201.
- 214** Ness AR MM. Frankel S. Smith GD. Frobisher C. Leary SD. Emmett PM. Gunnell D. Diet in childhood and adult cardiovascular and all cause mortality: the Boyd Orr cohort. *Heart.* 2005;91:894-898.
- 216** Nguyen L CT. Vanichseni S. McNicholl JM. Mock PA. Nelson R. Hodge TW. van Griensven F. Choopanya K. Mastro TD. Tappero JW. Hu DJ. Frequent human leukocyte antigen class I alleles are associated with higher viral load among HIV type 1 seroconverters in Thailand. *J Acquir Immune Defic Syndr.* . 2004;37:1318-1323.

- 217 Ninomiya T KY. Kubo M. Tanizaki Y. Tanaka K. Okubo K. Nakamura H. Hata J. Oishi Y. Kato I. Hirakata H. Iida M. Hyperhomocysteinemia and the development of chronic kidney disease in a general population: the Hisayama study. *Am J Kidney Dis.* . 2004;44:437-445.
- 217 Nothlings U WL. Murphy SP. Hankin JH. Henderson BE. Kolonel LN. Meat and fat intake as risk factors for pancreatic cancer: the multiethnic cohort study. *J Natl Cancer Inst.* 2005;97:1458-1465.
- 219 Oei HH vdMI. Hofman A. Koudstaal PJ. Stijnen T. Breteler MM. Witteman JC. Lipoprotein-associated phospholipase A2 activity is associated with risk of coronary heart disease and ischemic stroke: the Rotterdam Study. *Circulation.* 2005;111:570-575.
- 220 Oh JC WW. Tortolero-Luna G. Broaddus R. Gershenson DM. Burke TW. Schmandt R. Lu KH. Increased plasma levels of insulin-like growth factor 2 and insulin-like growth factor binding protein 3 are associated with endometrial cancer risk. *Cancer Epidemiol Biomarkers Prev.* 2004;13:748-752.
- 221 Oh K WW. Fuchs CS. Giovannucci EL. Glycemic index, glycemic load, and carbohydrate intake in relation to risk of distal colorectal adenoma in women. *Cancer Epidemiol Biomarkers Prev.* 2004;13:1192-1198.
- 222 Okamura T HT. Kadowaki T. Kita Y. Okayama A. Elliott P. Ueshima H; NIPPONDATA80 Research Group. Resting heart rate and cause-specific death in a 16.5-year cohort study of the Japanese general population. *Am Heart J.* 2004;147:1024-1032.
- 223 Olijhoek JK KJ. de Jaegere PP. Verhaar MC. Grobbee DE. van der Graaf Y. Visseren FL; SMART Study Group. Presence of the metabolic syndrome does not impair coronary collateral vessel formation in patients with documented coronary artery disease. *Diabetes Care.* 2005;28:683-689.
- 224 Olivot JM LJ. Aiach M. Amarenco P; GENIC Investigators. Soluble thrombomodulin and brain infarction: case-control and prospective study. *Stroke.* 2004;35:1946-1951.
- 225 Olson MB KD. Kelsey SF. Pepine CJ. Sopko G. Handberg E. Rogers WJ. Gierach GL. McClure CK. Merz CN; WISE Study Group. Hostility scores are associated with increased risk of cardiovascular events in women undergoing coronary angiography: a report from the NHLBI-Sponsored WISE Study. *Psychosom Med.* 2005;67:546-562.
- 226 Page JH CG. Rifai N. Barbieri RL. Willett WC. Hankinson SE. Plasma adrenal androgens and risk of breast cancer in premenopausal women. *Cancer Epidemiol Biomarkers Prev.* 2004;13:1032-1036.
- 227 Panichi V MU. Taccola D. Migliori M. Rizza GM. Consani C. Bertini A. Sposini S. Perez-Garcia R. Rindi P. Palla R. Tetta C. Interleukin-6 is a stronger predictor of total and cardiovascular mortality than C-reactive protein in haemodialysis patients. *Nephrol Dial Transplant.* 2004;19:1154-1160.
- 228 Pankow JS DB. Schmidt MI. Ballantyne CM. Couper DJ. Hoogeveen RC. Golden SH; Atherosclerosis Risk in Communities Study. Fasting plasma free fatty acids and risk of type 2 diabetes: the atherosclerosis risk in communities study. *Diabetes Care.* 2004;27:77-82.
- 229 Park HA LJ. Kuller LH. Relationship between premenopausal dietary intake and postmenopausal subclinical atherosclerosis. *Atherosclerosis.* 2005.
- 230 Pelfrene E VP. Moreau M. Mak RP. Kornitzer M. De Backer G. Use of benzodiazepine drugs and perceived job stress in a cohort of working men and



- women in Belgium. Results from the BELSTRESS-study. *Soc Sci Med*. 2004;59:433-442.
- 231** Pell JP. Corstorphine M. McConnachie A. et al. Post-discharge survival following pre-hospital cardiopulmonary arrest due to cardiac aetiology: temporal trends and impact of changes in clinical management. *Eur Heart J*. Feb 2006;27:406-412.
- 232** Pell JP SG. Walsh D. Pregnancy complications and subsequent maternal cerebrovascular events: a retrospective cohort study of 119.668 births. *Am J Epidemiol*. 2004;159:336-342.
- 233** Pena de la Vega L MR. Benda MM. Grill DE. Johnson MG. McCarthy JT. McBane RD 2nd. Association of heparin-dependent antibodies and adverse outcomes in hemodialysis patients: a population-based study. *Mayo Clin Proc*. 2005;80:995-1000.
- 234** Phipatanakul W CJ. Sredl DL. Weiss ST. Gold DR. Mouse exposure and wheeze in the first year of life. *Ann Allergy Asthma Immunol*. 2005;94:593-599.
- 235** Platek M KV. Micheli A. Browne R. Meneghini E. Sieri S. Schunemann HJ. Pala V. Barba M. Wilding GE. Berrino F. Muti P. Serum fructosamine and subsequent breast cancer risk: a nested case-control study in the ORDET prospective cohort study. *Cancer Epidemiol Biomarkers Prev*. 2005;14:271-274.
- 236** Polychronopoulos E PD. Polystiopiotti A.. Diet. lifestyle factors and hypercholesterolemia in elderly men and women from Cyprus. *Lipids Health Dis*. 2005;4:17.
- 237** Pussinen PJ AG. Tuomilehto J. Asikainen S. Jousilahti P. High serum antibody levels to Porphyromonas gingivalis predict myocardial infarction. *Eur J Cardiovasc Prev Rehabil*. 2004;11:408-411.
- 238** Qiu C FL. Karp A. Winblad B. Bellander T. Occupational exposure to electromagnetic fields and risk of Alzheimer's disease. *Epidemiology*. 2004;15:687-694.
- 239** Qiu C ST. Luthy DA. Williams MA. A prospective study of maternal serum C-reactive protein (CRP) concentrations and risk of gestational diabetes mellitus. *Paediatr Perinat Epidemiol*. . 2004;18:377-384.
- 240** Raaschou-Nielsen O PM. Leblanc A. Dumas P. Philippe Weber J. Olsen A. Tjonneland A. Overvad K. Olsen JH. Adipose organochlorine concentrations and risk of breast cancer among postmenopausal Danish women. *Cancer Epidemiol Biomarkers Prev*. 2005;14:67-74.
- 241** Rajala U LM. Paivansalo M. Suramo I. Keinanen-Kiukaanniemi S. Blood pressure and atherosclerotic plaques in carotid, aortic and femoral arteries in elderly Finns with diabetes mellitus or impaired glucose tolerance. *J Hum Hypertens*. . 2005;19:85-91.
- 242** Rajpathak S RE. Morris JS. Hu F. Toenail selenium and cardiovascular disease in men with diabetes. *J Am Coll Nutr*. 2005;24(4):250-256.
- 243** Ramos MI AL. Haan MN. Green R. Miller JW. Plasma folate concentrations are associated with depressive symptoms in elderly Latina women despite folic acid fortification. *Am J Clin Nutr*. . 2004;80:1024-1028.
- 244** Rashidkhani B AA. Lindblad P. Wolk A. Major dietary patterns and risk of renal cell carcinoma in a prospective cohort of Swedish women. *J Nutr*. . 2005;135:1757-1762.

- 245 Ray JG WP. Vermeulen MJ. Meier C. Cole DE. Greater maternal weight and the ongoing risk of neural tube defects after folic acid flour fortification. *Obstet Gynecol.* 2005;105:261-265.
- 246 Reijman M HJ. Bierma-Zeinstra SM. Koes BW. Christgau S. Christiansen C. Uitterlinden AG. Pols HA. A new marker for osteoarthritis: cross-sectional and longitudinal approach. *Arthritis Rheum.* 2004;50:2471-2478.
- 247 Ribeiro JC GS. Oliveira J. Andersen LB. Duarte JA. Mota J. Body fatness and clustering of cardiovascular disease risk factors in Portuguese children and adolescents. *Am J Hum Biol.* 2004;16:556-562.
- 248 Richardson DB WS. Lorey F. Hertz-Picciotto I. Adult hemoglobin levels at birth and risk of sudden infant death syndrome. *Arch Pediatr Adolesc Med.* 2004;158:366-371.
- 249 Ridker PM RN. Cook NR. Bradwin G. Buring JE. Non-HDL cholesterol. apolipoproteins A-I and B100. standard lipid measures. lipid ratios. and CRP as risk factors for cardiovascular disease in women. *JAMA.* 2005;294:326-333.
- 250 Rinaldi S. Kaaks R. Zeleniuch-Jacquotte A. et al. Insulin-like growth factor-I. IGF binding protein-3. and breast cancer in young women: a comparison of risk estimates using different peptide assays. *Cancer Epidemiol Biomarkers Prev.* Jan 2005;14:48-52.
- 251 Rock CL FS. Natarajan L. Thomson CA. Bardwell WA. Newman VA. Hollenbach KA. Jones L. Caan BJ. Pierce JP. Plasma carotenoids and recurrence-free survival in women with a history of breast cancer. *J Clin Oncol.* 2005;23:6631-6638.
- 252 Rosengren A WL. Orth-Gomer K. Coronary disease in relation to social support and social class in Swedish men. A 15 year follow-up in the study of men born in 1933. *Eur Heart J.* 2004;25:56-63.
- 253 Rosenthal AD JF. Shu XO. Yang G. Elasy TA. Chow WH. Ji BT. Xu HX. Li Q. Gao YT. Zheng W. Body fat distribution and risk of diabetes among Chinese women. *Int J Obes Relat Metab Disord.* 2004;28:594-599.
- 254 Rossi R CE. Nuzzo A. Cioni E. Origliani G. Modena MG. Flow-mediated vasodilation and the risk of developing hypertension in healthy postmenopausal women. *J Am Coll Cardiol.* 2004;44:1636-1640.
- 255 Rossi R CE. Nuzzo A. Origliani G. Modena MG. Endothelial-dependent vasodilation and incidence of type 2 diabetes in a population of healthy postmenopausal women. *Diabetes Care.* 2005;28:702-707.
- 256 Rouillier P B-RM. Bertrais S. Arnault N. Daudin JJ. Bacro JN. Hercberg S. Alcohol and atherosclerotic vascular disease risk factors in French men: relationships are linear. J-shaped. and U-shaped. *Alcohol Clin Exp Res.* 2005;29:84-88.
- 257 Rumbold AR MF. Crowther CA. Dietary intake of vitamin C and vitamin E and the development of hypertensive disorders of pregnancy. *Eur J Obstet Gynecol Reprod Biol.* 2005;119:67-71.
- 258 Rusiecki JA DRA. Lee WJ. Dosemeci M. Lubin JH. Hoppin JA. Blair A. Alavanja MC. Cancer incidence among pesticide applicators exposed to atrazine in the Agricultural Health Study. *J Natl Cancer Inst.* 2004;96:1375-1382.
- 259 Rutter MK MJ. Sullivan LM. D'Agostino RB Sr. Wilson PW. C-reactive protein. the 3037metabolic syndrome. and prediction of cardiovascular events in the Framingham Offspring Study. *Circulation.* 2004;110:380-385.

- 260** Salvarani C CL. Macchioni P. Consonni D. Cantini F. Bajocchi G. Pipitone N. Catanoso MG. Boiardi L. Risk factors for visual loss in an Italian population-based cohort of patients with giant cell arteritis. *Arthritis Rheum.* 2005;53:293-297.
- 261** Samelson EJ KD. Broe KE. Zhang Y. Cupples LA. Hannan MT. Wilson PW. Levy D. Williams SA. Vaccarino V. Metacarpal cortical area and risk of coronary heart disease: the Framingham Study. *Am J Epidemiol.* 2004;159:589-595.
- 262** Sanchez PL MJ. Pabon P. Martin F. Piedra I. Palacios IF. Martin-Luengo C. Prognostic relations between inflammatory markers and mortality in diabetic patients with non-ST elevation acute coronary syndrome. *Heart.* 2004;90:264-269.
- 263** Sato Y TY. Nakaya N. Ogawa K. Kurashima K. Kuriyama S. Hozawa A. Nishino Y. Shibuya D. Tsuji I. Fruit and vegetable consumption and risk of colorectal cancer in Japan: The Miyagi Cohort Study. *Public Health Nutr.* 2005;8:309-314.
- 264** Saw SM TS. Fung D. Chia KS. Koh D. Tan DT. Stone RA. IQ and the association with myopia in children. *Invest Ophthalmol Vis Sci.* 2004;45:2493-2498.
- 265** Schaumberg DA LS. Seddon JM. Willett WC. Hankinson SE. Dietary glycemic load and risk of age-related cataract. *Am J Clin Nutr.* 2004;80:489-495.
- 266** Schernhammer ES HJ. Pollak MN. Hankinson SE. Circulating levels of insulin-like growth factors, their binding proteins, and breast cancer risk. *Cancer Epidemiol Biomarkers Prev.* 2005;14:699-704.
- 267** Schernhammer ES HS. Urinary melatonin levels and breast cancer risk. *J Natl Cancer Inst.* 2005;97:1084-1087.
- 268** Schillinger M EM. Sabeti S. Mlekusch W. Amighi J. Handler S. Quehenberger P. Kalifeh N. Wagner O. Minar E. High plasma heparin cofactor II activity protects from restenosis after femoropopliteal stenting. *Thromb Haemost.* 2004;95:1108-1113.
- 269** Schnabel R RH. Lackner KJ. Lubos E. Bickel C. Meyer J. Munzel T. Cambien F. Tiret L. Blankenberg S; AtheroGene Investigators. Analysis of N-terminal-pro-brain natriuretic peptide and C-reactive protein for risk stratification in stable and unstable coronary artery disease: results from the AtheroGene study. *Eur Heart J.* 2005;26:241-249.
- 270** Schoen RE WJ. Kuller LH. Thaete FL. Evans RW. Hayes RB. Rosen CJ. Insulin-like growth factor-I and insulin are associated with the presence and advancement of adenomatous polyps. *Gastroenterology.* 2005;129:464-475.
- 271** Schuiling WJ dWA. Dennesen PJ. Algra A. Rinkel GJ. The simplified acute physiology score to predict outcome in patients with subarachnoid hemorrhage. *Neurosurgery.* 2005;57:230-236.
- 272** Schulze MB HK. Manson JE. Willett WC. Meigs JB. Weikert C. Heidemann C. Colditz GA. Hu FB. Dietary pattern, inflammation, and incidence of type 2 diabetes in women. *Am J Clin Nutr.* 2005;82:675-684.
- 273** Schulze MB LS. Rimm EB. Manson JE. Willett WC. Hu FB. Glycemic index, glycemic load, and dietary fiber intake and incidence of type 2 diabetes in younger and middle-aged women. *Am J Clin Nutr.* 2004;80:348-356.

- 274 Schulze MB RE. Li T. Rifai N. Stampfer MJ. Hu FB. C-reactive protein and incident cardiovascular events among men with diabetes. *Diabetes Care*. 2004;27:889-894.
- 275 Schulze MB SC. Rifai N. Cohen RM. Sparrow J. Hu FB. Manson JE. Hyperproinsulinaemia and risk of Type 2 diabetes mellitus in women. *Diabet Med*. 2005;22:1178-1184.
- 276 Schulze MB SI. Manson JE. Li T. Rifai N. Jiang R. Hu FB. Joint role of non-HDL cholesterol and glycated haemoglobin in predicting future coronary heart disease events among women with type 2 diabetes. *Diabetologia*. 2004;47:2129-2136.
- 277 Schupf N CR. Luchsinger J. Tang MX. Lee JH. Mayeux R. Relationship between plasma lipids and all-cause mortality in nondemented elderly. *J Am Geriatr Soc*. 2005;53:219-226.
- 278 Seddon JM GS. Rosner B. Rifai N. Progression of age-related macular degeneration: prospective assessment of C-reactive protein, interleukin 6, and other cardiovascular biomarkers. *Arch Ophthalmol*. 2005;123:774-782.
- 279 Selvin E CJ. Golden SH. Brancati FL. Folsom AR. Steffes MW. Glycemic control and coronary heart disease risk in persons with and without diabetes: the atherosclerosis risk in communities study. *Arch Intern Med*. 2005;165:1910-1916.
- 280 Selvin E CJ. Golden SH. Boland LL. Brancati FL. Steffes MW; Atherosclerosis risk in communities study. Glycemic control, atherosclerosis, and risk factors for cardiovascular disease in individuals with diabetes: the atherosclerosis risk in communities study. *Diabetes Care*. 2005;28:1965-1973.
- 281 Sesso HD BJ. Norkus EP. Gaziano JM. Plasma lycopene, other carotenoids, and retinol and the risk of cardiovascular disease in women. *Am J Clin Nutr*. 2004;79:47-53.
- 282 Sesso HD BJ. Zhang SM. Norkus EP. Gaziano JM. Dietary and plasma lycopene and the risk of breast cancer. *Cancer Epidemiol Biomarkers Prev*. 2005;14:1074-1081.
- 283 Shai I SM. Manson JE. Stampfer MJ. Rifai N. Hu FB. A prospective study of lipoprotein(a) and risk of coronary heart disease among women with type 2 diabetes. *Diabetologia*. 2005;48:1469-1476.
- 284 Shalak LF PJ. Jackson GL. Lupton AR. Depression at birth in term infants exposed to maternal chorioamnionitis: does neonatal fever play a role? *J Perinatol*. . 2005;25:447-452.
- 285 Shankar A KB. Klein R. Relationship between white blood cell count and incident hypertension. *Am J Hypertens*. 2004;17:233-239.
- 286 Sheehan J PI. Reilly M. Salim A. Collins M. Twomey EM. Daly A. Loingsigh SN. Elwood P. Ben-Shlomo Y. Davey-Smith G. QT dispersion, QT maximum and risk of cardiac death in the Caerphilly Heart Study. *Eur J Cardiovasc Prev Rehabil*. 2004;11:63-68.
- 287 Shy BD RT. Becker LJ. Eisenberg MS. Time to intubation and survival in prehospital cardiac arrest. *Prehosp Emerg Care*. 2004;8:394-398.
- 288 Sieri S. Krogh V. Pala V. et al. Dietary patterns and risk of breast cancer in the ORDET cohort. *Cancer Epidemiol Biomarkers Prev*. Apr 2004;13(4):567-572.
- 289 Silvera SA JM. Howe GR. Miller AB. Rohan TE. Dietary carbohydrates and breast cancer risk: a prospective study of the roles of overall glycemic index and glycemic load. *Int J Cancer*. 2005;114:653-658.

- 290 Silvera SA RT. Jain M. Terry PD. Howe GR. Miller AB. Glycemic index, glycemic load, and pancreatic cancer risk (Canada). *Cancer Causes Control*. 2005;16:431-436.
- 291 Sin DD WL. Man SF. The relationship between reduced lung function and cardiovascular mortality: a population-based study and a systematic review of the literature. *Chest*. 2005;127:1952-1959.
- 292 Singh JA ND. Fink HA. Nichol KL. Health-related quality of life predicts future health care utilization and mortality in veterans with self-reported physician-diagnosed arthritis: the veterans arthritis quality of life study. *Semin Arthritis Rheum*. . 2005;34:755-765.
- 293 Singh SM PL. Li C. He J. Vinden C. Rabeneck L. Association of socioeconomic status and receipt of colorectal cancer investigations: a population-based retrospective cohort study. *CMAJ*. 2004;171(5):461-465.
- 294 Skuladottir H TA. Overvad K. Stripp C. Christensen J. Raaschou-Nielsen O. Olsen JH. Does insufficient adjustment for smoking explain the preventive effects of fruit and vegetables on lung cancer? *Lung Cancer*. 2004;45:1-10.
- 295 Slinin Y FR. Collins AJ. Calcium, phosphorus, parathyroid hormone, and cardiovascular disease in hemodialysis patients: the USRDS waves 1, 3, and 4 study. *J Am Soc Nephrol*. 2005;16:1788-1793.
- 296 Smith W WJ. Wong TY. Rochtchina E. Klein R. Leeder SR. Mitchell P. Retinal arteriolar narrowing is associated with 5-year incident severe hypertension: the Blue Mountains Eye Study. *Hypertension*. 2004;44:442-447.
- 297 Song Y MJ. Buring JE. Liu S. Dietary magnesium intake in relation to plasma insulin levels and risk of type 2 diabetes in women. *Diabetes Care*. 2004;27:59-65.
- 298 Song Y MJ. Cook NR. Albert CM. Buring JE. Liu S. Dietary Magnesium Intake and Risk of Cardiovascular Disease Among Women. *Am J Cardiol*. 2005;96:1135-1141.
- 299 Sornay-Rendu E MF. Duboeuf F. Delmas PD. Rate of Forearm Bone Loss Is Associated With an Increased Risk of Fracture Independently of Bone Mass in Postmenopausal Women: The OFELY Study. *J Bone Miner Res*. . 2005;20:1929-1935.
- 300 Sornay-Rendu E MF. Garnero P. Duboeuf F. Delmas PD. Identification of Osteopenic Women at High Risk of Fracture: The OFELY Study. *J Bone Miner Res*. 2005;20:1813-1819.
- 301 Sprenkle MD ND. Nelson DB. Nichol KL. The Veterans Short Form 36 questionnaire is predictive of mortality and health-care utilization in a population of veterans with a self-reported diagnosis of asthma or COPD. *Chest*. 2004;126:81-89.
- 302 Stack AG MB. Molony DA. Survival differences between peritoneal dialysis and hemodialysis among "large" ESRD patients in the United States. *Kidney Int*. 2004;65(6):2398-2408.
- 303 Stattin P BA. Biessy C. Kaaks R. Hallmans G. Adlercreutz H. Prospective study of plasma enterolactone and prostate cancer risk (Sweden). *Cancer Causes Control*. 2004;15:1095-1102.
- 304 Stattin P LS. Tenkanen L. Alfthan H. Jellum E. Hallmans G. Thoresen S. Hakulinen T. Luostarinen T. Lehtinen M. Dillner J. Stenman UH. Hakama M. High levels of circulating testosterone are not associated with increased prostate cancer risk: a pooled prospective study. *Int J Cancer*. 2004;108:418-424.

- 305** Stattin P RS. Biessy C. Stenman UH. Hallmans G. Kaaks R. High levels of circulating insulin-like growth factor-I increase prostate cancer risk: a prospective study in a population-based nonscreened cohort. *J Clin Oncol.* 2004;22:3104-3112.
- 306** Stolzenberg-Solomon RZ LP. Pollak M. Taylor PR. Virtamo J. Albanes D. Insulin-like growth factor (IGF)-1. IGF-binding protein-3. and pancreatic cancer in male smokers. *Cancer Epidemiol Biomarkers Prev.* 2004;13:438-444.
- 307** Storti KL BJ. Fitzgerald SJ. Zmuda JM. Cauley JA. Kriska AM. Physical activity and decreased risk of clinical gallstone disease among post-menopausal women. *Prev Med.* . 2005;41(3-4):772-777.
- 308** St-Pierre AC CB. Dagenais GR. Mauriege P. Bernard PM. Despres JP. Lamarche B. Low-density lipoprotein subfractions and the long-term risk of ischemic heart disease in men: 13-year follow-up data from the Quebec Cardiovascular Study. *Arterioscler Thromb Vasc Biol.* 2005;25:553-559.
- 309** St-Pierre AC CB. Dagenais GR. Mauriege P. Bernard PM. Despres JP. Lamarche B. Low-density lipoprotein subfractions and the long-term risk of ischemic heart disease in men: 13-year follow-up data from the Quebec Cardiovascular Study. *Arterioscler Thromb Vasc Biol.* 2005;25:353-359.
- 310** Suzuki K IY. Wakai K. Kawado M. Hashimoto S. Toyoshima H. Kojima M. Tokudome S. Hayakawa N. Watanabe Y. Tamakoshi K. Suzuki S. Ozasa K. Tamakoshi A; Japan Collaborative Cohort Study Group. Serum oxidized low-density lipoprotein levels and risk of colorectal cancer: a case-control study nested in the Japan Collaborative Cohort Study. *Cancer Epidemiol Biomarkers Prev.* 2004;13:1781-1787.
- 311** Svensson AM MD. Abrahamsson P. Dellborg M. Association between hyper- and hypoglycaemia and 2 year all-cause mortality risk in diabetic patients with acute coronary events. *Eur Heart J.* 2005;26:1255-1261.
- 312** Sweeney C BC. Anderson KE. Lazovich D. Folsom AR. Risk factors for breast cancer in elderly women. *Am J Epidemiol.* 2004;160:868-875.
- 313** Takebayashi T NY. Uemura T. Nakashima H. Nomiyama T. Sakurai H. Omae K. A six year follow up study of the subclinical effects of carbon disulphide exposure on the cardiovascular system. *Occup Environ Med.* 2004;61:127-134.
- 314** Tan ZS SS. Beiser A. Zhang Y. Felson D. Hannan MT. Au R. Wolf PA. Kiel DP. Bone mineral density and the risk of Alzheimer disease. *Arch Neurol.* 2005;62:107-111.
- 315** Tanne D MJ. Goldbourt U. Body fat distribution and long-term risk of stroke mortality. *Stroke.* 2005;35:1021-1025.
- 316** Tarnow L AA. Parving HH. Elevated placental growth factor (PIGF) predicts cardiovascular morbidity and mortality in type 1 diabetic patients with diabetic nephropathy. *Scand J Clin Lab Invest Suppl.* 2005;240:73-79.
- 317** Tarnow L HP. Hansen BV. Borch-Johnsen K. Parving HH. Plasma N-terminal pro-brain natriuretic peptide as an independent predictor of mortality in diabetic nephropathy. *Diabetologia.* 2005;48:149-155.
- 318** Taylor EN SM. Curhan GC. Dietary factors and the risk of incident kidney stones in men: new insights after 14 years of follow-up. *J Am Soc Nephrol.* 2004;15:3225-3232.
- 319** Taylor EN SM. Curhan GC. Fatty acid intake and incident nephrolithiasis. *Am J Kidney Dis.* 2005;45:267-274.

- 320 Taylor HA Jr CB. Garrison RJ. Andrew ME. Han H. Fox ER. Arnett DK. Samdarshi T. Jones DW. Relation of aortic valve sclerosis to risk of coronary heart disease in African-Americans. *Am J Cardiol.* 2005;95:401-404.
- 321 Thomson CC FL. Winickoff JP. Colditz GA. Camargo CA Jr. King C 3rd. Frazier AL. State tobacco excise taxes and adolescent smoking behaviors in the United States. *J Public Health Manag Pract.* 2004;10:490-496.
- 322 Thorand B KH. Baumert J. Koenig W. Chambless L. Meisinger C. Illig T. Martin S. Herder C. Elevated levels of interleukin-18 predict the development of type 2 diabetes: results from the MONICA/KORA Augsburg Study, 1984-2002. *Diabetes.* 2005;54:2392-2398.
- 323 Tolmunen T HJ. Ruusunen A. Voutilainen S. Tanskanen A. Valkonen VP. Viinamaki H. Kaplan GA. Salonen JT. Dietary folate and the risk of depression in Finnish middle-aged men. A prospective follow-up study. *Psychother Psychosom.* 2004;73:334-339.
- 324 Tolmunen T HJ. Voutilainen S. Ruusunen A. Alfthan G. Nyyssonen K. Viinamaki H. Kaplan GA. Salonen JT. Association between depressive symptoms and serum concentrations of homocysteine in men: a population study. *Am J Clin Nutr.* 2004;80:1574-1578.
- 325 Touvier M KE. Clavel-Chapelon F. Boutron-Ruault MC. Dual Association of beta-carotene with risk of tobacco-related cancers in a cohort of French women. *J Natl Cancer Inst.* 2005;97:1338-1344.
- 326 Tripepi G MF. Zoccali C. Inflammation markers, adhesion molecules, and all-cause and cardiovascular mortality in patients with ESRD: searching for the best risk marker by multivariate modeling. *J Am Soc Nephrol.* 2005;16:S93-98.
- 327 Tsai CJ. Leitzmann MF. Willett WC. Giovannucci EL. Long-term intake of dietary fiber and decreased risk of cholecystectomy in women. *Am J Gastroenterol.* Jul 2004;99:1364-1370.
- 328 Tsai CJ LM. Willett WC. Giovannucci EL. The effect of long-term intake of cis unsaturated fats on the risk for gallstone disease in men: a prospective cohort study. *Ann Intern Med.* 2004;141:514-522.
- 329 Tsai CJ LM. Willett WC. Giovannucci EL. Dietary protein and the risk of cholecystectomy in a cohort of US women: the Nurses' Health Study. *Am J Epidemiol.* 2004;160:11-18.
- 330 Tsai CJ LM. Willett WC. Giovannucci EL. Glycemic load, glycemic index, and carbohydrate intake in relation to risk of cholecystectomy in women. *Gastroenterology.* 2005;129:105-112.
- 331 Tsai CJ LM. Willett WC. Giovannucci EL. Dietary carbohydrates and glycaemic load and the incidence of symptomatic gall stone disease in men. *Gut.* 2005;54:823-828.
- 332 Tsai CJ LM. Willett WC. Giovannucci EL. Long-term intake of trans-fatty acids and risk of gallstone disease in men. *Arch Intern Med.* 2005;165:1011-1015.
- 333 Tseng M BR. DeVellis RF. Ziegler RG. Dietary patterns and prostate cancer risk in the National Health and Nutrition Examination Survey Epidemiological Follow-up Study cohort. *Cancer Epidemiol Biomarkers Prev.* 2004;13:71-77.
- 334 Tseng M BR. Graubard BI. Ziegler RG. Dairy, calcium, and vitamin D intakes and prostate cancer risk in the National Health and Nutrition Examination Epidemiologic Follow-up Study cohort. *Am J Clin Nutr.* 2005;81:1147-1154.

- 335 Tsimikas S BE. Miller ER. McConnell JP. Lennon RJ. Kornman KS. Witztum JL. Berger PB. Oxidized phospholipids. Lp(a) lipoprotein. and coronary artery disease. *N Engl J Med.* 2005;353:46-57.
- 336 Tsubono Y OT. Kobayashi M. Yamamoto S. Sobue T. Tsugane S; JPHC Study Group. No association between fruit or vegetable consumption and the risk of colorectal cancer in Japan. *Br J Cancer.* 2005;92:1782-1784.
- 337 Tsushima M NA. Lee J. Stemmermann GN. Prospective study of the association of serum triglyceride and glucose with colorectal cancer. *Dig Dis Sci.* 2005;50:499-505.
- 338 Turner BJ WM. Yang C. TenHave T. Predicting adherence to colonoscopy or flexible sigmoidoscopy on the basis of physician appointment-keeping behavior. *Ann Intern Med.* 2004;140:528-532.
- 339 Tworoger SS EA. Rosner B. Sluss P. Hankinson SE. Plasma prolactin concentrations and risk of postmenopausal breast cancer. *Cancer Res.* 2004;64:6814-6819.
- 340 Tworoger SS MS. Barbieri RL. Willett WC. Colditz GA. Hankinson SE. Plasma sex hormone concentrations and subsequent risk of breast cancer among women using postmenopausal hormones. *J Natl Cancer Inst.* 2005;97:595-602.
- 341 Ulvik A VS. Hansen S. Gislefoss R. Jellum E. Ueland PM. Colorectal cancer and the methylenetetrahydrofolate reductase 677C -> T and methionine synthase 2756A -> G polymorphisms: a study of 2.168 case-control pairs from the JANUS cohort. *Cancer Epidemiol Biomarkers Prev.* 2004;13:2175-2180.
- 342 Van Den Brink CL PH. Van Den Bos GA. Giampaoli S. Nissinen A. Kromhout D. Duration and intensity of physical activity and disability among European elderly men. *Disabil Rehabil.* 2005;27:341-347.
- 343 van der A DL GD. Roest M. Marx JJ. Voorbij HA. van der Schouw YT. Serum ferritin is a risk factor for stroke in postmenopausal women. *Stroke.* 2005;36:1637-1641.
- 344 van Gelder BM TM. Kalmijn S. Giampaoli S. Nissinen A. Kromhout D. Physical activity in relation to cognitive decline in elderly men: the FINE Study. *Neurology.* 2004;63: 2316-21.
- 345 van Gils CH PP. Bueno-de-Mesquita HB. Boshuizen HC. Lahmann PH. Clavel-Chapelon F. Thiebaut A. Kesse E. Sieri S. Palli D. Tumino R. Panico S. Vineis P. Gonzalez CA. Ardanaz E. Sanchez MJ. Amiano P. Navarro C. Quiros JR. Key TJ. Allen N. Khaw KT. Bingham SA. Psaltopoulou T. Koliva M. Trichopoulou A. Nagel G. Linseisen J. Boeing H. Berglund G. Wirfalt E. Hallmans G. Lenner P. Overvad K. Tjonneland A. Olsen A. Lund E. Engeset D. Alsaker E. Norat T. Kaaks R. Slimani N. Riboli E. Consumption of vegetables and fruits and risk of breast cancer. *JAMA.* 2005;293:183-193.
- 346 Van Guelpen B HJ. Johansson I. Stegmayr B. Hallmans G. Nilsson TK. Weinehall L. Witthoft C. Palmqvist R. Winkvist A. Folate, vitamin B12, and risk of ischemic and hemorrhagic stroke: a prospective, nested case-referent study of plasma concentrations and dietary intake. *Stroke.* 2005;36:1426-1431.
- 347 van Hecke MV DJ. Nijpels G. Moll AC. Heine RJ. Bouter LM. Polak BC. Stehouwer CD. Inflammation and endothelial dysfunction are associated with retinopathy: the Hoorn Study. *Diabetologia.* 2005;48:1300-1306.
- 348 van Meurs JB D-RR. Pluijm SM. van der Klift M. de Jonge R. Lindemans J. de Groot LC. Hofman A. Witteman JC. van Leeuwen JP. Breteler MM. Lips



- P. Pols HA. Uitterlinden AG. Homocysteine levels and the risk of osteoporotic fracture. *N Engl J Med.* 2004;350:2033-2041.
- 349 Verma A. Kilicaslan F. Martin DO. et al. Preimplantation B-type natriuretic peptide concentration is an independent predictor of future appropriate implantable defibrillator therapies. *Heart.* Feb 2006;92:190-195.
- 350 Visser M GB. Kritchevsky SB. Newman AB. Nevitt M. Rubin SM. Simonsick EM. Harris TB. Muscle mass, muscle strength, and muscle fat infiltration as predictors of incident mobility limitations in well-functioning older persons. *J Gerontol A Biol Sci Med Sci.* 2005;60:324-333.
- 351 Voutilainen S VJ. Rissanen TH. Alfthan G. Laukkanen J. Nyyssonen K. Mursu J. Valkonen VP. Tuomainen TP. Kaplan GA. Salonen JT. Serum folate and homocysteine and the incidence of acute coronary events: the Kuopio Ischaemic Heart Disease Risk Factor Study. *Am J Clin Nutr.* 2004;80:317-323.
- 352 Vrbova L MM. Moineddin R. Jaakimainen L. Upshur RE. Does socioeconomic status affect mortality subsequent to hospital admission for community acquired pneumonia among older persons? *J Negat Results Biomed.* 2005;4:4.
- 353 Vriesendorp TM MQ. Devries JH. Legemate DA. Hoekstra JB. Early post-operative glucose levels are an independent risk factor for infection after peripheral vascular surgery. A retrospective study. *Eur J Vasc Endovasc Surg.* 2004;28:520-525.
- 354 Wakai K SK. Ito Y. Kojima M. Tamakoshi K. Watanabe Y. Toyoshima H. Hayakawa N. Hashimoto S. Tokudome S. Suzuki S. Kawado M. Ozasa K. Tamakoshi A; Japan Collaborative Cohort Study Group. Serum carotenoids, retinol, and tocopherols, and colorectal cancer risk in a Japanese cohort: effect modification by sex for carotenoids. *Nutr Cancer.* 2005;51:13-24.
- 355 Wakai K TK. Date C. Fukui M. Suzuki S. Lin Y. Niwa Y. Nishio K. Yatsuya H. Kondo T. Tokudome S. Yamamoto A. Toyoshima H. Tamakoshi A; JACC Study Group. Dietary intakes of fat and fatty acids and risk of breast cancer: a prospective study in Japan. *Cancer Sci.* 2005;96:590-599.
- 356 Wang AY SM. Tang N. Sanderson JE. Lui SF. Li PK. Woo J. Resting energy expenditure and subsequent mortality risk in peritoneal dialysis patients. *J Am Soc Nephrol.* 2004;15:3134-3143.
- 357 Wang J. Work stress as a risk factor for major depressive episode(s). *Psychol Med.* 2005;35:865-871.
- 358 Wang TJ EJ. Meigs JB. Rifai N. Fox CS. D'Agostino RB. Levy D. Vasan RS. Low-grade albuminuria and the risks of hypertension and blood pressure progression. *Circulation.* 2005;111:1370-1376.
- 359 Wang Y RE. Stampfer MJ. Willett WC. Hu FB. Comparison of abdominal adiposity and overall obesity in predicting risk of type 2 diabetes among men. *Am J Clin Nutr.* 2005;81:555-563.
- 360 Wannamethee SG LD. Whincup PH. Walker M. Ebrahim S. Davey-Smith G. Birthweight of offspring and paternal insulin resistance and paternal diabetes in late adulthood: cross sectional survey. *Diabetologia.* 2004;47:12-18.
- 361 Wark PA WM. van 't Veer P. van Wijhe G. Luchtenborg M. van Muijen GN. de Goeij AF. Goldbohm RA. van den Brandt PA. Fruits, vegetables, and hMLH1 protein-deficient and -proficient colon cancer: The Netherlands cohort study. *Cancer Epidemiol Biomarkers Prev.* 2005;14:1619-1625.
- 362 Wattanakit K FA. Selvin E. Weatherley BD. Pankow JS. Brancati FL. Hirsch AT. Risk factors for peripheral arterial disease incidence in persons with

- diabetes: the Atherosclerosis Risk in Communities (ARIC) Study. *Atherosclerosis*. 2005;180:389-397.
- 363** Weinstein AR SH. Lee IM. Cook NR. Manson JE. Buring JE. Gaziano JM. Relationship of physical activity vs body mass index with type 2 diabetes in women. *JAMA*. 2004;292:1188-1194.
- 364** Weinstein SJ. Wright ME. Pietinen P. et al. Serum alpha-tocopherol and gamma-tocopherol in relation to prostate cancer risk in a prospective study. *J Natl Cancer Inst*. Mar 2 2005;97:396-399.
- 365** Whittemore AS CP. Feldman D. Cohn BA. Prostate specific antigen levels in young adulthood predict prostate cancer risk: results from a cohort of Black and White Americans. *J Urol*. 2005;174:872-876.
- 366** Wolf M SJ. Shah A. Vossen Smirnakis K. Jimenez-Kimble R. Ecker JL. Thadhani R. Inflammation and glucose intolerance: a prospective study of gestational diabetes mellitus. *Diabetes Care*. 2004;27:21-27.
- 367** Wolk R BP. Lennon RJ. Brilakis ES. Johnson BD. Somers VK. Plasma leptin and prognosis in patients with established coronary atherosclerosis. *J Am Coll Cardiol*. 2004;44:1819-1824.
- 368** Wong TY KM. Klein R. Klein BE. Hubbard LD. A prospective cohort study of retinal arteriolar narrowing and mortality. *Am J Epidemiol*. 2004;159:819-825.
- 369** Wong TY KR. Sharrett AR. Duncan BB. Couper DJ. Klein BE. Hubbard LD. Nieto FJ; Atherosclerosis Risk in Communities Study. Retinal arteriolar diameter and risk for hypertension. *Ann Intern Med*. 2004;140:248-255.
- 370** Wong TY SA. Klein R. Klein BE. Retinal vessel diameters and the incidence of gross proteinuria and renal insufficiency in people with type 1 diabetes. *Diabetes*. 2004;53:179-184.
- 371** Wong TY SA. Klein R. Klein BE. Hubbard LD. Retinal arteriolar narrowing, hypertension, and subsequent risk of diabetes mellitus. *Arch Intern Med*. 2005;165:1060-1065.
- 372** Wrensch M WA. Wiencke J. Miike R. Sison J. Wiemels J. Barger G. DeLorenze G. Aldape K. Kelsey K. History of chickenpox and shingles and prevalence of antibodies to varicella-zoster virus and three other herpesviruses among adults with glioma and controls. *Am J Epidemiol*. 2005;161:929-938.
- 373** Wright ME MD. Pietinen P. Taylor PR. Virtamo J. Albanes D. Estimated Urine pH and Bladder Cancer Risk in a Cohort of Male Smokers (Finland)\*. *Cancer Causes Control*. 2005;16:1117-1123.
- 374** Wright ME MS. Stolzenberg-Solomon RZ. Li Z. Pietinen P. Taylor PR. Virtamo J. Albanes D. Development of a comprehensive dietary antioxidant index and application to lung cancer risk in a cohort of male smokers. *Am J Epidemiol*. 2004;160:68-76.
- 375** Wu K HF. Fuchs C. Rimm EB. Willett WC. Giovannucci E. Dietary patterns and risk of colon cancer and adenoma in a cohort of men (United States). *Cancer Causes Control*. 2004;15:853-862.
- 376** Yamagata H KY. Nakamura S. Kubo M. Tanizaki Y. Matsumoto T. Tanaka K. Kato I. Shirota T. Iida M. Impact of fasting plasma glucose levels on gastric cancer incidence in a general Japanese population: the Hisayama study. *Diabetes Care*. 2005;28:789-794.
- 377** Yang G SX. Jin F. Elasy T. Li HL. Li Q. Huang F. Zhang XL. Gao YT. Zheng W. Yang G. Shu XO. Jin F. Elasy T. Li HL. Li Q. Huang F. Zhang XL. Gao YT. Zheng W. Soyfood consumption and risk of glycosuria: a cross-sectional

- study within the Shanghai Women's Health Study. *Eur J Clin Nutr.* 2004;58:615-620.
- 378** Yeh HC PN. Wang NY. Pankow JS. Duncan BB. Brancati FL. Vital capacity as a predictor of incident type 2 diabetes: the Atherosclerosis Risk in Communities study. *Diabetes Care.* 2005;28:1472-1479.
- 379** Yende S. Tuomanen EI. Wunderink R. et al. Preinfection systemic inflammatory markers and risk of hospitalization due to pneumonia. *Am J Respir Crit Care Med.* Dec 1 2005;172:1440-1446.
- 380** Yuan JM RR. Gao YT. Qu YH. Chu XD. Yu MC. Prediagnostic levels of serum micronutrients in relation to risk of gastric cancer in Shanghai. China. *Cancer Epidemiol Biomarkers Prev.* 2004;13:1772-1780.
- 381** Zeleniuch-Jacquotte A AH. Shore RE. Koenig KL. Kato I. Arslan AA. Toniolo P. Circulating enterolactone and risk of breast cancer: a prospective study in New York. *Br J Cancer.* 2004;91:99-105.
- 382** Zeleniuch-Jacquotte A GY. Shore RE. Koenig KL. Arslan AA. Kato I. Rinaldi S. Kaaks R. Toniolo P. Postmenopausal levels of sex hormones and risk of breast carcinoma in situ: results of a prospective study. *Int J Cancer.* . 2004;114:323-327.
- 383** Zeleniuch-Jacquotte A SR. Koenig KL. Akhmedkhanov A. Afanasyeva Y. Kato I. Kim MY. Rinaldi S. Kaaks R. Toniolo P. Postmenopausal levels of oestrogen. androgen. and SHBG and breast cancer: long-term results of a prospective study. *Br J Cancer.* 2004;90:153-159.
- 384** Zhang C WM. Sorensen TK. King IB. Kestin MM. Thompson ML. Leisenring WM. Dashow EE. Luthy DA. Maternal plasma ascorbic Acid (vitamin C) and risk of gestational diabetes mellitus. *Epidemiology.* 2004;15:597-604.
- 385** Zhang C WM. Frederick IO. King IB. Sorensen TK. Kestin MM. Dashow EE. Luthy DA. Vitamin C and the risk of gestational diabetes mellitus: a case-control study. *J Reprod Med.* 2004;49:257-266.
- 386** Zhang SM HS. Hunter DJ. Giovannucci EL. Colditz GA. Willett WC. Folate intake and risk of breast cancer characterized by hormone receptor status. *Cancer Epidemiol Biomarkers Prev.* 2005;14:2004-2008.
- 387** Zhang X SX. Gao YT. Yang G. Matthews CE. Li Q. Li H. Jin F. Zheng W. Anthropometric predictors of coronary heart disease in Chinese women. *Int J Obes Relat Metab Disord.* 2004;28:734-740.
- 388** Zhang X SX. Li H. Yang G. Li Q. Gao YT. Zheng W. Prospective cohort study of soy food consumption and risk of bone fracture among postmenopausal women. *Arch Intern Med.* 2005;165:1890-1895.
- 389** Zylberstein DE BC. Bjorkelund C. Landaas S. Sundh V. Thelle D. Lissner L. Serum homocysteine in relation to mortality and morbidity from coronary heart disease: a 24-year follow-up of the population study of women in Gothenburg. *Circulation.* 2004;109:601-606.
